# Supplementary material for: A viroid-derived system to produce large amounts of recombinant RNA in Escherichia coli
Source: PubMed Central journal article supplement (PMC5789856; doi:10.1038/s41598-018-20314-3), 2018-01-30
Supplement: 41598_2018_20314_MOESM1_ESM.pdf [file 41598_2018_20314_MOESM1_ESM.pdf]

## **SUPPLEMENTARY INFORMATION**

### **A viroid-derived system to produce large amounts of recombinant RNA in *Escherichia coli***

**José-Antonio Daròs\*, Verónica Aragonés & Teresa Cordero**

Instituto de Biología Molecular y Celular de Plantas (Consejo Superior de Investigaciones Científicas-Universitat Politècnica de València), 46022 Valencia, Spain. Correspondence and requests for materials should be addressed to J.-A.D. (email: [jadaros@ibmcp.upv.es](mailto:jadaros@ibmcp.upv.es))

**Figure S1.** Nucleotide sequences and elements of plasmids pLELVd, p15tRn1Sm and p15mCherry.

>pLELVd (2050 bp)

```

CGATGCTTCTTTGAGCGAACGATCAAAAATAAGTGCCTTCCCATCAAAAAATATTCTCAACATAAAAACTTTG
TGTAATACTTGTAAACGCTGCCCATAGGGTGGTGTGTGCCACCCCTGATGAGACCGAAAAGGTCGAAATGGGGTTT
CGCCATGGGTGCGGACTTTAAATTCGGAGGATTTCGTCTTTAAACGTTCTTCCAAGAGTCCCTTCCCCAAACCCCT
TACTTTGTAAGTGTGGTTCGGCGAATGTACCGTTTCGTCTTTTCGGACTCATCAGGGAAAAGTACACACTTTCCGA
CGGTGGGTTTCGTGACACCTCTCCCCCTCCAGGTAATATCCCTTTCAAGGATGTGTTCCCTAGGAGGGTGGGT
GTACCTCTTTTGGATTGCTCCGGCCTTCCAGGAGAGATAGAGGACGACCTCTCCCATAGGGTGGTGTGTGCCAC
CCCTGATGAGACCGAAAAGGTCGAAATGGGGGAAATCATCTTAGCGAAAGCTAAGGATTTTTTTTATCTGAATG
CGTTGCTGGCGTTTTTCCATAGGCTCCGCCCCCTGACGAGCATCAAAAAATCGACGCTCAAGTCAGAGGTGGC
GAAACCCGACAGGACTATAAAGATAACCAGGCGTTTTCCCCTGGAAGCTCCCTCGTGCGCTCTCTGTTCGGACC
TGCCGCTTACCGGATACCTGTCCGCTTTTCTCCCTTCGGGAAGCGTGGCGCTTTCTCATAGCTCACGCTGTAGGT
ATCTCAGTTCGGTGTAGGTGCTTCGCTCCAAGCTGGGCTGTGTGCACGAACCCCCCGTTTCCAGCCGACCGCTGCG
CCTTATCCGGTAACTATCGTCTTGAGTCCAACCCGGTAAGACACGACTTATCGCCACTGGCAGCAGCCACTGGTA
ACAGGATTAGCAGAGCGAGGTATGTAGGCGGTGCTACAGAGTTCCTGAAGTGGTGGCTAACTACGGCTACACTA
GAAGACAGTATTTGGTATCTGCGCTCTGCTGAAGCCAGTTACCTTCGGAAAAAGAGTTGGTAGCTCTTGATCCG
GCAAAACAAACCCGCTGGTAGCGGTGGTTTTTTGTTTGAAGCAGCAGATTACGCGCAGAAAAAAGGATCTC
AAGAAGATCCTTTTTACCAATGCTTAATCAGTGAGGACCTATCTCAGCGATCTGTCTATTTCGTTCAATCCATAG
TTGCCTGACTCCCCGTCGTGTAGATAACTACGATACGGGAGGGCTTACCATCTGGCCCCAGTCTGCATCCATAG
CGCGAGAGCCACGCTCACCAGCTCCAGATTTATCAGCAATAAACCAGCCAGCCGGAAGGGCCGAGCGCAGAAGTG
GTCCTGCAACTTTATCCGCTCCATCCAGTCTATTAATTGTTGCCGGGAAGCTAGAGTAAGTAGTTCGCCAGTTA
ATAGTTTGCGCAACGTTGTTGCCATTGCTACAGGCATCGTGGTGTACGCTCGTCTGTTGGTATGGCTTCATTCA
GCTCCGGTTCCCAACGATCAAGGCGAGTTACATGATCCCCATGTTGTGCAAAAAAGCGGTTAGCTCCTTCGGTC
CTCCGATCGTTGTCAGAAGTAAGTTGGCCGAGTGTATCACTCATGGTATGGCAGCACTGCATAATTTCTCTTA
CTGTCATGCCATCCGTAAGATGCTTTTTCTGTGACTGGTGAAGTACTCAACCAAGTCATTTCTGAGAATAGTGTATGC
GGCGACCGAGTTGCTCTTGGCCGGCGTCAATACGGGATAATACCGCGCCACATAGCAGAACTTTAAAAGTGCTCA
TCATTGGAAAACGTTCTTCGGGGCGAAAACCTCTCAAGGATCTTACCCTGTTGAGATCCAGTTCGATGTAACCA
CTCGTGACCCAACTGATCTTACGATCTTTTACTTTTACCAGCGTTTCTGGGTGAGCAAAAACAGGAAGGCAA
ATGCCGCAAAAAGGGAATAAGGGCGACACGAAATGTTGAATACTCATACTCTTCTTTTTTCAATATTTATGAA
GCATTTATCAGGGTTATTGTCTCAT

```

*E. coli* **murein lipoprotein promoter** is in red and **ELVd** cDNA (C327 to G46 of AJ536613) is in black with the repeated hammerhead ribozyme domain on yellow background. Ribozymes self-cleavage sites are underlined. *E. coli* ribosomal **rrnC terminator** is in fuchsia. **pUC replication origin** is in gray and **ampicillin resistance gene** (inverse orientation) on gray background (**promoter** on dark gray background).

>p15tRn1Sm (5338 bp)

```

TAATACGACTCACTATAGGGAGACCACAACGGTTTCCCTCTAGAAATAATTTTGTTTAACTTTAAGAAGGAGATA
TACCATGTCGGTTTTCGCATAGGGTCATTTACTCTTTTCACTCATTACAACTCTATAATCTCTCTTCTTTTATC
ATCTTTGCCTTCTAGAATCTTCTTCCCTTTTCAATCTCCTTCTTTCACACGTTCTCTTCACTCATGCCAACAA
TCAGGAAAGGGGTGGTTATGAAGGAAAAAATGGCAAGTGAGGCCAAGTTCCAATAGGGTACCAGGCTCGTCTTC
AAATGTGGAACCTGTATCTGCTGCAACTGCTGAAGCCATTACCGACCGTCTAAAAGTCCGTGGATATTACTGAAAG
TGGTGCACAGTCTAGTGTTCAGTTCACATCTCTTTCAGTTTTGGCAGCGTTGGATTAGCACCCCAGTCACCTGTGCA
ACATCAAAAAGTAATCTGGAAACCCAAATCATATGGAACAGTGTCTGGAGCCCAGTGGTTGAAGCTGGAAAAAC
ACCAGTTGAACAAAAAAGTGCTCTTTTAAAGTAAATTTATTCAAGGGTAATTTATTGGAAAAATTTACTGTAGATAA
CTCAACATTTCTCGAGAGCCCAAGTAAGGGCCACTTTCTACCCAAAATTTGAGAATGAGAAATCAGATCAGGAGAT
CAGGACAAGGATGATAGAGATGGTCTCCAAAGGCTTGGCTATAGTCGAGGTCACACTTAAGCATTCTGGATCTCT
TTTTATGTATGCTGGGCATGAAGGTGGAGCATATGCCAAGAATAGCTTTCGGGAATATCTATACTGCCGTTGGCGT
CTTTGTTCTTGGACGGATGTTTTCGTGAGGCATGGGGAACATAAAGCAAGCAAGAAGCAAGCAGAGTTCAATGAGTT
TCTTGAGCGCAATCGTATGTGCATATCAATGGAGTTGGTCACGGCAGTGTGGGGGACCACGGACAACGCCCACG
AGATGATTATGCGGTTGTGACTGCAGTCACGGAGTTGGGAAATGGAAAACCAACTTTCTATTCAACTCCCAGATGT
AATTGCTTTTTGTCAGGGAATGGCGATTACCAACAAATCATGTATGGCTGTCTCAACAAGGAAATCAGTGACTTC
CTTCTTTGCTGCGTATGATGCACTTTGCGAGGAAGGTACAGCAACCACCGTTTTCGAGGGCTCTCAGCGAAGTTGC
TGATATTTCTGTACCTGGATCAAAAAGACCATATAAAGTGCAGGGTGAAATTTTGGAGGGTCTCGTGGCCCGCAT
CGTAAAACGTGAGAGCTCAGAGCATATGGAGCGGGTCTGAGAGATTTTCTCCTCCGCCATCAGAGGGTGAGGG
TTTTGGACCTGGGACCTACGTTACGTGAAATTTGTGCTGCAAAACAGATCAGAAAAGCAGCAAAATAAAGGCACCTTCT

```

TCAGAGTGCTGGCACGGCTTTCTGCCCGAATTATTTGGACTGGTTTTGGAGATGAAAACCTCTGGTTCACATTC AAG  
AAATGCTGATCGATCTGTTGTCTCAAAGTTCTTACAATCACATCCTGCTGATCTTTATACAGGAAAAATACAGGA  
AATGGTTTCGCTTGATGAGGGAAAAGCGCTTTTCTGCTGCTTTTCAAGTGTCAATTATACTTACATAAAAAATTAATGA  
TGTATCGAGTAACAACCTGCCTTTCAAATGGTGATCCATGTATATAGTGATTCAGGCTTCCGCCGGTACCAGAA  
AGAGATGAGGCACAAACCAGGACTATGGCCTTTGTATCGAGGCTTTTTTGTGACCTGGATTTATTC AAGGTCAA  
TGAGAAGAAAACCTGCTGAAATGGCAGGAAGCAACAATCAAATGGTAAAAAATGTGGAAGAGGACAACAGTTTAGC  
TGATGAAGATGCAAATCTGATGGTCAAGATGAAATTTCTTACTTACAAGTTGAGAACTTTTTTGATCCGTAATGG  
CTTGTGCGACTCTTTCAAAGAAGGACCTTCTGCGTATAAGTCTTATTACCTGAGGCAAATGAAAATTTGGAATAC  
TTCAGCAGCCAAGCAACGAGAACTCAGCAAGATGCTTGATGAATGGGCAGTATATATACGCAGAAAAATATGGGAA  
CAAACCATTGTCATCATCCACATACCTAAGTGAAGCTGAGCCTTTTCTTGAACAATATGCAAAGCGTAGTCCACA  
AAATCATGCTTTGATAGGATCTGCTGGAAAATTTGTCAAAGTTGAAGATTTTCATGGCTATTTGTTGAAGGAGAAGA  
TGAAGAGGGTGATCTCGAGCCTGCGAAAAGATATTGCTCCTTCAAGCCCTAGTATTTCCACCAGAGACATGGTGGC  
AAAGAATGAGGGTCTCATTATTTTTCTTTCCAGGAATACCAGGTTGTGCTAAAATCTGC ACTTTGTAAGGAAAATACT  
GAATGCTCCAGGAGGGCTTGGAGATGATCGACCAGTTAACAGTTTAAATGGGTGATCTTATTAAGGTAGATATTG  
GCAAAAAGTTGCTGATGAACGTCGAAGAAAACCTTACTCGATCATGCTTGCTGACAAGAAATGCACCAAATGAGGA  
AGTATGAAAACAAATGAGAACATGTGCCTAAGCACCAGGAGCATCTGCTATTCCAGTTATACCTGATTCAGAAG  
AACTGAAACTAATCCATTCTCTATTGATGC ACTTTGCGGTTTTTATATTCCGAGTACTTCACCGTGTCAATCATCC  
GGGAAATCTTGACAAGTCATCTCAAATGCTGGATATGTGATGCTTATGTTTTATCACCTTTATGATGGAAGAG  
CCGTCCAGGAGTTCGAGAGTGAGCTTATTGAACGTTTTGGATCGCTTGTGAGAATTCCTGTACTGAAACCTGAGAG  
GTCTCCTCTTCCGATTCTGTGAGGTCTATTATCGAGGAGGGACTCAGTCTGTACAGACTTCATACAACGAAACA  
TGGAAGATTGGAGTCTACAAAAGGGACATATGTACAAGAGTGGGTAAATGGGAGAAAGCAATTGAGAGATATTCT  
ACTTGGAAATGCAGACTATCTCAATTC AATACAGGTTCCATTTGAATTTGCCGTTAAAAGAAAGTCCTTGAAACACT  
GAAAGTTATTGCGAGGGGGCGAATATGCAGTGCCTGCTGAGAAGAGGAAGCTAGGATCCATTGTATTCGCCGCTAT  
CAGCCTGCCAGTTCAGAAATCTAGGTCTTCTAATGATCTAGCAAAGAAAGATCCAAAGGTTGGCGATTTTCAT  
TAAGACAAGAGCATGGAGAGCAGCATTGAGAAGGCCCATCTTACCCTGGCTCACAAGAGAAGTACCGGTGTAC  
TGCAGTTGCCAATTACGGTTCTTTCTTTCATCAAAGGTTGCCAGTAGACGTGGCTGCTTTGTTCTTCCGATAA  
ATTGGCTGCACTAGAAGCTGAGCCTGGCTCTGTTGAAGGTGAAAAGATCAATTTCTAAAACCTGATGGCCCCATAT  
CACATTATGGTCTGGTGCAGGAGTTGCCGCAAAGATGCCAATACACTACCACAGTTACTTTCCCAAGGGGAAGGC  
TACCCGCATTGATATAAATCCACCGGTCACTATAACTGGCACTCTCGAATTCTTT**CACCACCACCACCACCAC**TG  
AGATCCGGCTGCTAACAAAGCCCGAAAAGGAAGCTGAGTTGGCTGCTGCCACCCTGAGCAATAAC**TAGCATAACC**  
**CCTTGGGGCTCTAAACGGGTCTTGAGGGGTTTTTG**CTGAAAGG**AGATCTGGCGGGGCC**CGCTAGCGGAGTG  
TATACTGGCTTACTATGTTGGCACTGATGAGGGTGTGAGTGAAGTGCTTCATGTGGCAGGAGAAAAAGGCTGCA  
CCGGTGCCTCAGCAGAATATGTGATACAGGATATATTCCGCTTCTCGCTCACTGACTCGCTACGCTCGGTGCTT  
CGACTGCGGCGAGCGGAAATGGCTTACGAACGGGGCGGAGATTTCTGGAAGATGCCAGGAAGATACTTAACAGG  
GAAGTGAGAGGGCCGCGGCAAAGCCGTTTTTCCATAGGCTCCGCCCCCTGACAAGCATCACGAAATCTGACGCT  
CAAATCAGTGGTGGCGAAACCCGACAGGACTATAAAGATACCAGGCGTTTTCCCCCTGGCGGCTCCCTCGTGCCT  
CTCCTGTTCTGCTTTCCGTTTTACCGGTGTCAATCCGCTGTTATGGCCGCGTTTTGTCTCATTCCACGCTGACA  
CTCAGTTCCGGGTAGGCAGTTCCGCTCCAAGCTGGACTGTATGCACGAACCCCCCGTTTCCAGTCCGACCGCTGCGCC  
TTATCCGGTAACTATCGTCTTGAGTCCAACCCGAAAAGACATGCAAAAAGCACCCTGGCAGCAGCCACTGGTAAT  
TGATTTAGAGGAGTTAGTCTTGAAGTCATGCGCCGGTTAAGGCTAAACTGAAAAGGACAAGTTTTGGTGACTGCGC  
TCCTCCAAGCCAGTTACCTCGGTTCAAAGAGTTGGTAGCTCAGAGAACCTTCGAAAAACCGCCCTGCAAGGCGGT  
TTTTTCGTTTTTCAGAGCAAGAGATTACGCGCAGACCAAAACGATCTCAAGAAGATCATCTTATTAAT**TTACGCCCC**  
**GCCCTGCCACTCATCGCAGTACTGTTGTAATTCATTAAGCATTCTGCCGACATGGAAGCCATCACAGACGGCATG**  
**ATGAACCTGAATCGCCAGCGGCATCAGCACCTTGTGCGCTTGCATATAATTTGCCATGGTGAAAACGGGGC**  
**GAAGAAGTTGTCCATATTGGCCACGTTTAAATCAAACCTGGTGAACACTCACCCAGGATGGCTGAGACGAAAAA**  
**CATATTCTCAATAAACCTTTAGGGAAATAGGCCAGTTTTTACCCTAACACGCCACATCTTGCGAATATATGTG**  
**TAGAAACTGCCGAAATCGTCTGTTTCACTCCAGAGCGATGAAAACGTTTCCAGTTTGTCTCATGGAAAACGGT**  
**GTAACAAGGGTGAACACTATCCCATATCACCAGCTCACCCTTTTCAATGCCATACGGAATTCGGATGAGCATT**  
**CATCAGGCGGGCAAGAATGTGAATAAAGGCCGATAAACTTGTGCTTATTTTTCTTTACGGTCTTTAAAAAGGC**  
**CGTAATATCCAGCTGAACGGTCTGGTTATAGGTACATTGAGCAACTGACTGAAATGCCTCAAATGTTCTTTACG**  
**ATGCCATTGGGATATATCAACGGTGGTATATCCAGTGATTTTTTTCTCCATTTAGCTTCTTAGCTCCTGAAAA**  
**TCTCGATAACTCAAAAATACGCCCGGTAGTGATCTTATTTCAATATGGTGAAGTTGGAA**CCCGGGGCGGCGG****  
**CCGC**CCGCGAAAT

**T7 bacteriophage promoter** underlined with the **+1** nucleotide of the transcript on yellow background. Eggplant tRNA ligase (JX0225157) in black with the theoretical amino-terminal **transit peptide** on green background and the carboxy-terminal **hexahistidine tag** in blue. **Stop codon** in red. **T7 bacteriophage terminator** on red background. **p15A replication**

origin in gray and chloramphenicol resistance gene (reverse orientation) in blue (*promoter* in italics).

>p15mCherry (2623 bp)

**TAATACGACTCACTATAG**GGGGACCACAACGGTTTCCTCTAGAAATAATTTTGTTTAACTTTAAGAAGGAGATA  
TACC**ATGGTTAGCAAAGGCGAGGAGGATAACATGGCCATCATCAAGGAGTTCATGCGCTTCAAGGTGCACATGGA**  
**GGGCTCCGTGAACGGCCACGAGTTCGAGATCGAGGGCGAGGGCGAGGGCCGCCCTACGAGGGCAGCCAGACCCG**  
**CAAGCTGAAGGTGACCAAGGGTGGCCCCCTGCCCTTCGCTGGGACATCCTGTCCCCTCAGTTCATGTACGGCTC**  
**CAAGGCCTACGTGAAGCACCCCGCCGACATCCCGACTACTTGAAGCTGTCTTCCCCGAGGGCTTCAAGTGGGA**  
**GCGCGTGATGAACTTCGAGGACGGCGGCGTGGTGACCGTGACCCAGGACTCCTCCCTGCAGGACGGCGAGTTCAT**  
**CTACAAGGTGAAGCTGCGCGGCACCAACTTCCCCTCCGACGGCCCCGTAATGCAGAAGAAGACCATGGGCTGGGA**  
**GGCCTCCTCCGAGCGGATGTACCCCGAGGACGGCGCCCTGAAGGGCGAGATCAAGCAGAGGCTGAAGCTGAAGGA**  
**CGGCGGCCACTACGACGCTGAGGTCAAGACCACCTACAAGGCCAAGAAGCCCGTGCAGCTGCCCGGCGCCTACAA**  
**CGTCAACATCAAGTTGGACATCACCTCCCACAACGAGGACTACACCATCGTGGAAACAGTACGAACGCGCCGAGGG**  
**CCGCCACTCCACCGGCGGCATGGATGAGCTGTATAAG**AGCGCATGGAGT**CATCCTCAATTGAGAAA**GGTGGAGG  
TTCTGGCGGTGGATCGGGAGGTT**CAGCGTGGAGCCACCCGAGTTCGAAAAATCCGGA**TGAGATCCGGCTGTAA  
CAAAGCCCGAAAGGAAGCTGAGTTGGCTGCTGCCACCGCTGAGCAATAAC**TAGCATAACCCCTTGGGGCTCTAA**  
**ACGGTCTTGGGGTTTTTTC**CTGAAAGGAGATCTGGCGGGGCCGCGCTAGCGGAGTGTATACTGGCTTACTA  
TGTGGCACTGATGAGGGTGTCAAGTGAAGTGCCTCATGTGGCAGGAGAAAAAAGGCTGCACCGGTGCGTCAGCAG  
AATATGTGATACAGGATATATTTCCGCTTCTCCTCGCTCACTGACTCGCTACGCTCGGTGCTGACTGCGGCGAGCG  
GAAATGGCTTACGAACGGGGCGGAGATTTCTGGAAGATGCCAGGAAGATACTTAACAGGGAAGTGAAGGGGCCG  
CGGCAAAGCCGTTTTTCCATAGGCTCCGCCCCCTGACAAGCATCACGAAATCTGACGCTCAAAATCAGTGGTGGC  
GAAACCCGACAGGACTATAAAGATAACCAGGCGTTTTCCCCCTGGCGGCTCCCTCGTGCGCTCTCCTGTTCCTGCCT  
TTCGGTTTTACCGGTGTCATTCCGCTGTTATGGCCGCGTTTTGTCTCATTCCACGCTGACACTCAGTTCGGGTAG  
GCAGTTCGCTCCAAGCTGGACTGTATGCAAGAACCCCGTTAGTCCGACCGCTGCGCCTTATCCGGTAACTAT  
CGTCTTGAGTCCAACCCGAAAGACATGCAAAAGCACCACTGGCAGCAGCCACTGGTAATTGATTTAGAGGAGTT  
AGTCTTGAAGTCATGCGCCGGTTAAGGCTAAACTGAAAGGACAAGTTTTTGGTACTGCGCTCCTCAAGCCAGTT  
ACCTCGGTTCAAAGAGTTGGTAGCTCAGAGAACCTTCGAAAAACCGCCCTGCAAGGCGGTTTTTTCGTTTTTCA  
GCAAGAGATTACGCGCAGACCAAAACGATCTCAAGAAGATCATCTTATTAATTACGCCCGCCCTGCCACTCATC  
GCAGTACTGTTGTAATTCATTAAGCATTTCTGCCGACATGGAAGCCATCACAGACGGCATGATGAACCTGAATCGC  
CAGCGGCATCAGCACCTTGTGCGCTTGCCTATAATATTTGCCCATGGTGAACCGGGGGCGAAGAAGTTGTCCAT  
ATTGGCCACGTTTTAAATCAAACCTGGTGAACCTCACCCAGGGATTGGCTGAGACGAAAAACATATTTCTCAATAAA  
CCCTTTAGGGAAATAGGCCAGGTTTTACCGTAACACGCCACATCTTGCGAATATATGTGTAGAAACTGCCGGAA  
ATCGTCTGGTATTCACTCCAGAGCGATGAAAACGTTTTAGTTTTGCTCATGGAAAACGGTGTAAACAAGGGTGAAC  
ACTATCCCATATCACAGCTCACCGTCTTTTATTGCCATACGGAATTCCGGATGAGCATTCATCAGGCGGGCAAG  
AATGTGAATAAAGGCCGGATAAACTTGTGCTTATTTTTCTTTACGGTCTTTAAAAAGGCCGTAATATCCAGCTG  
AACGGTCTGGTTATAGGTACATTGAGCAACTGACTGAAATGCCTCAAATGTTCTTTACGATGCCATTGGGATAT  
ATCAACGGTGGTATATCCAGTGATTTTTTTCTCCATTTAGCTTCTTAGCTCCTGAAAATCTCGATAACTCAA  
AAATACGCCCGGTAGTGATCTTATTTCAATTATGGTGAAGTTGGAACCCGGGGCGGCGGCCGCCCGCAAT

**T7 bacteriophage promoter** underlined with the **+1** nucleotide of the transcript on yellow background. **mCherry** (AY678264) cDNA on red background, including four **silent mutations** (underlined) and a carboxy-terminal **Twin-Srep-tag** in red. **Stop codon** in red. **T7 bacteriophage terminator** on red background. p15A replication origin in gray and chloramphenicol resistance gene (reverse orientation) in blue (*promoter* in italics).

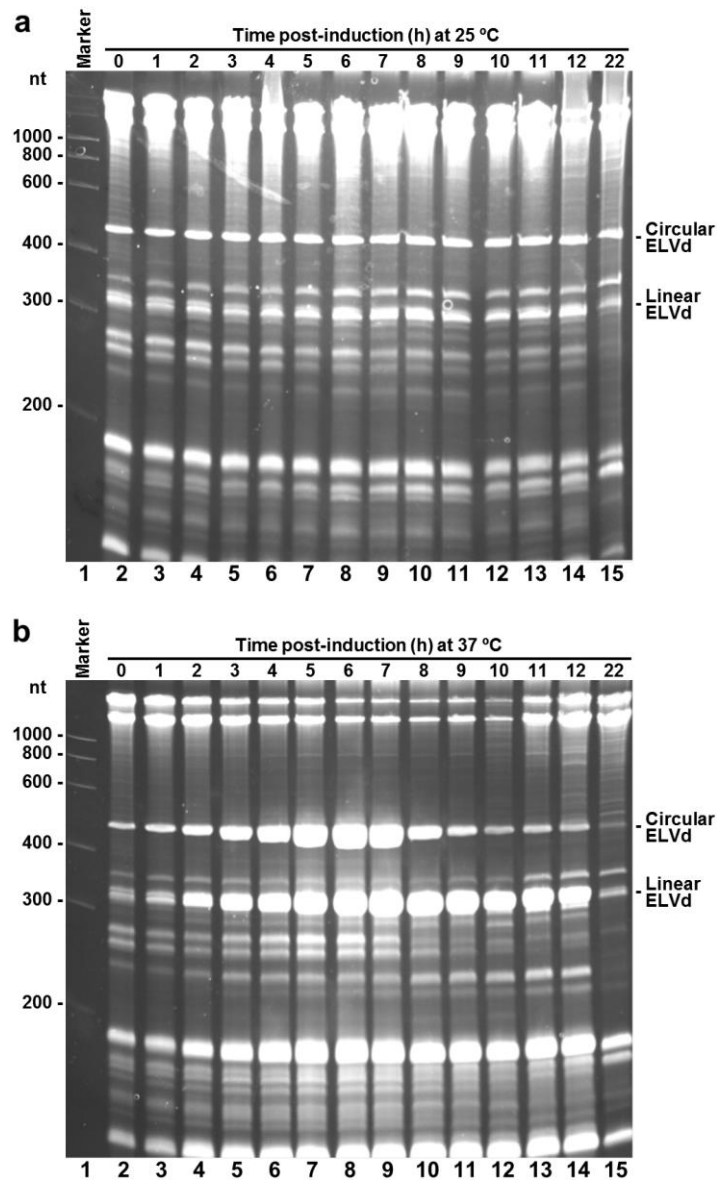

**Figure S2.** Time-course analysis of the RNA that accumulated in *E. coli* cells that co-expressed ELVd RNA and eggplant tRNA ligase, grown at 25°C (a) and 37°C (b). Aliquots of the cultures were taken at the indicated time points after induction of tRNA ligase expression. RNA was extracted and analyzed by denaturing PAGE and ethidium bromide staining. Lanes 1, RNA marker with the sizes of the standards indicated on the left in nt; lanes 2 to 15, RNA from aliquots of the cultures taken at 0, 1, 2, 3, 4, 5, 6, 7, 8, 9, 10, 11, 12 and 22 h post-induction. The positions of the circular and linear ELVd RNAs are indicated on the right. *E. coli* cultures were induced with 0.4 mM IPTG at DO<sub>600</sub> 0.6. Each lane contains an aliquot of RNA corresponding to 0.8 ml of culture.

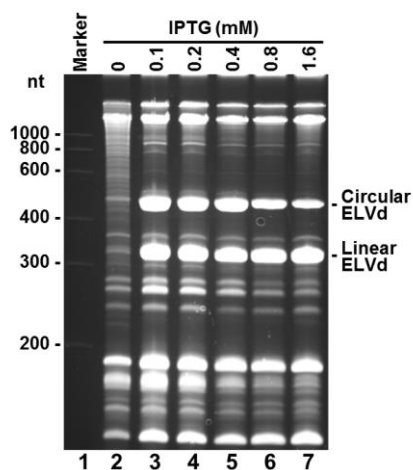

**Figure S3.** Analysis of the RNA that accumulated in *E. coli* cells that co-expressed ELVd RNA and eggplant tRNA ligase, induced with different amounts of IPTG. RNA preparations were separated by denaturing PAGE and the gel stained with ethidium bromide. Lane 1, RNA marker with the sizes of the standards indicated on the left in nt; lane 2, RNA from a non-induced culture; lanes 3 to 7, RNAs from cultures induced with 0.1, 0.2, 0.4, 0.8 and 1.6 mM IPTG, respectively. The positions of the circular and linear ELVd RNAs are indicated on the right. *E. coli* cultures were grown at 37°C and induced at DO<sub>600</sub> 0.6. Bacteria were harvested at 6 h post-induction. Each lane contains an aliquot of RNA corresponding to 0.8 ml of culture.

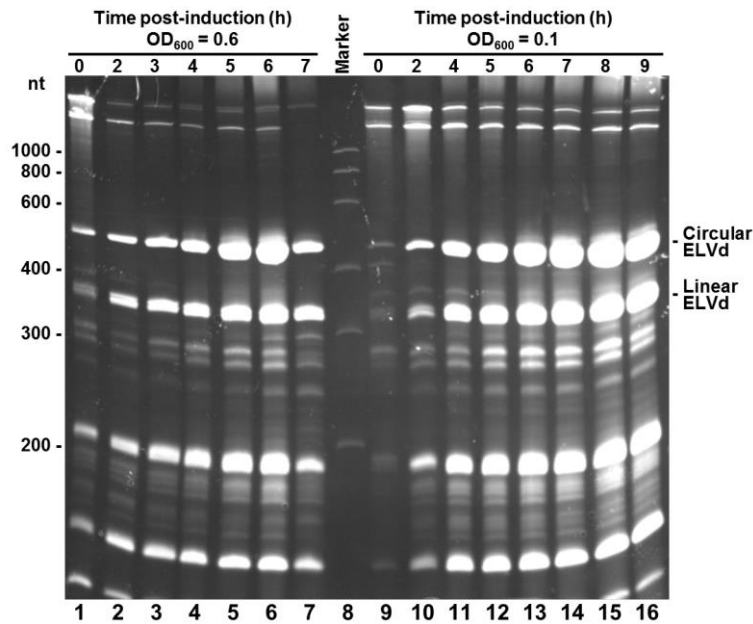

**Figure S4.** Time-course analysis of the RNA that accumulated in *E. coli* cells that co-expressed ELVd RNA and eggplant tRNA ligase, induced at different  $OD_{600}$ . Aliquots were taken from the cultures at different time points, and RNA extracted and analyzed by denaturing PAGE and ethidium bromide staining. Lanes 1 to 7, RNAs from the culture induced at  $OD_{600}$  0.6 taken at 0, 2, 3, 4, 5, 6 and 7 h post-induction; lane 8, RNA marker with the sizes of the standards indicated on the left in nt; lanes 9 to 16, RNAs from the culture induced at  $OD_{600}$  0.1 taken at 0, 2, 4, 5, 6, 7, 8 and 9 h post-induction. The positions of the circular and linear ELVd RNAs are indicated on the right. *E. coli* cultures were grown at 37°C and induced with 0.1 mM ITPG. Each lane contains an aliquot of RNA corresponding to 0.4 ml of culture.

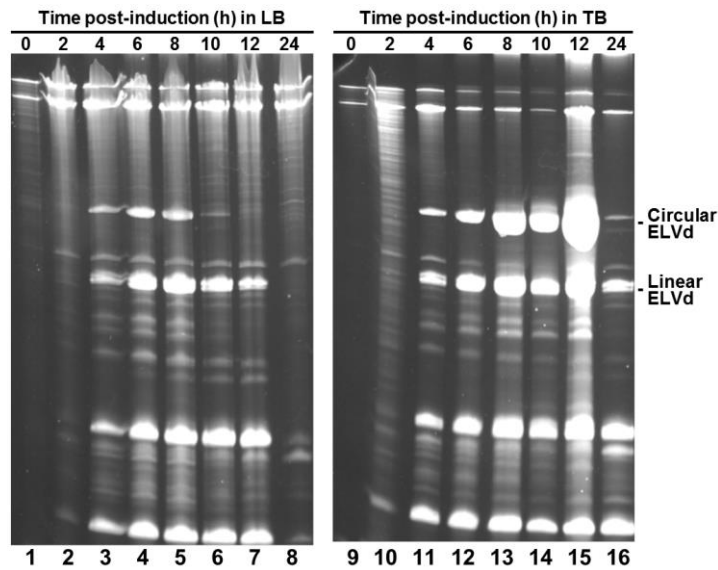

**Figure S5.** Time-course analysis of the RNA that accumulated in *E. coli* cells that co-expressed ELVd RNA and eggplant tRNA ligase, grown in LB and TB media. Aliquots were taken from the cultures at different time points, as indicated. RNAs were extracted and analyzed by denaturing PAGE and ethidium bromide staining of the gels. Lanes 1 to 8, RNAs from the culture grown in LB medium taken at 0, 2, 4, 6, 8, 10, 12 and 24 h post-induction; lanes 9 to 16, RNAs from the culture grown in TB medium taken at 0, 2, 4, 6, 8, 10, 12 and 24 h post-induction. The positions of the circular and linear ELVd RNAs are indicated on the right. *E. coli* cultures were grown at 37°C and induced with 0.1 mM IPTG at DO<sub>600</sub> 0.1 mM. Each lane contains an aliquot of RNA corresponding to 0.4 ml of culture.



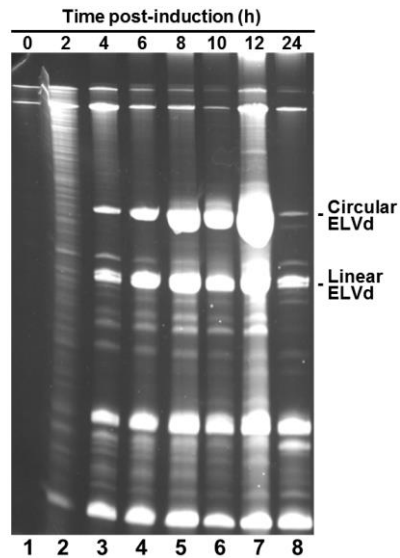

**Figure S6.** Time-course analysis of the RNA accumulated in *E. coli* cells that co-expressed ELVd RNA and eggplant tRNA ligase in optimized conditions (culture grown at 37°C in TB medium and induced with 0.1 mM ITPG at  $DO_{600}$  0.1). Aliquots from the culture were taken at different time points and RNA purified. RNAs were separated by denaturing PAGE and the gel stained with ethidium bromide. Lanes 1 to 8, RNAs from aliquots taken at 0, 2, 4, 6, 8, 10, 12 and 24 h post-induction of tRNA ligase expression. The positions of the circular and linear ELVd RNAs are indicated on the right. Each lane contains an aliquot of RNA corresponding to 0.4 ml of culture.

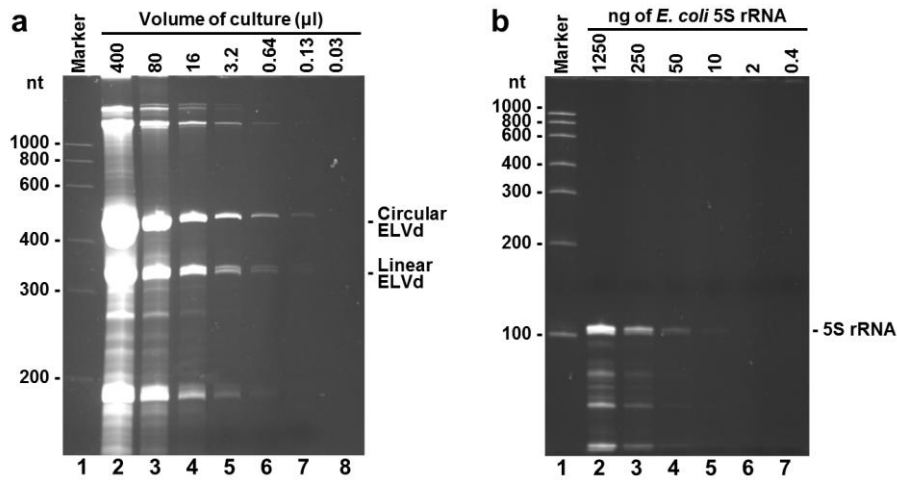

**Figure S7.** Quantification of the ELVd RNA produced in *E. coli* with the viroid-derived system in optimal conditions. RNA samples were separated by denaturing PAGE and the gels stained with ethidium bromide. **(a)** The RNA extracted from an aliquot of a culture taken at 12 h post-induction (see [Supplementary Fig. S6](#)) was subjected to 1/5 serial dilutions and electrophoresed. Lane 1, RNA marker with the sizes of the standards indicated on the left in nt; lanes 2 to 8, serial dilutions of the RNA preparation that corresponded to 400, 80, 16, 3.2, 0.64, 0.13 and 0.03 μl of the original culture, respectively. **(b)** A quantified preparation of *E. coli* 5S rRNA was subjected to 1/5 serial dilution before separation by PAGE and staining of the gel. Lane 1, RNA marker with the sizes of the standards indicated on the left in nt; lanes 2 to 7, 1250, 250, 50, 10, 2 and 0.4 ng of the *E. coli* 5S rRNA standard, respectively. The positions of the circular and linear ELVd RNAs, and the 5S rRNA are indicated on the right of the corresponding panel.

**Figure S8.** Sequences of the full-length ELVd cDNA present in plasmid pLELVd and the different ELVd deleted forms assayed in the viroid-derived system to produce recombinant RNA in *E. coli*. The position of the deletion is indicated on blue background. Hammerhead ribozyme domain is indicated on yellow background.

>ELVd

GGGTGGTGTGTGCCACCCCTGATGAGACCGAAAGGTCGAAATGGGGTTTCGCCATGGGTCTGGGACTTTAAATTCG  
GAGGATTCGTCTTTAAACGTTCCCTCCAAGAGTCCCTTCCCCAAACCCCTTACTTTGTAAGTGTGGTTCGGCGAAT  
GTACCGTTTTCGTCTTTTCGGACTCATCAGGGAAAGTACACACTTTCCGACGGTGGGTTCGTGACACCTCTCCCC  
CTCCCAGGTACTATCCCCTTTCAAGGATGTGTTCCCTAGGAGGGTGGGTGTACCTCTTTTGATTGCTCCGGCCT  
TCCAGGAGAGATAGAGGACGACCTCTCCCCATA

>ELVd L1

GGGTGGTGTGTGCCACCCCTGATGAGACCGAAAGGTCGAAATGGGGTTTCGCCATCAAACCCCTTACTTTGTAAGT  
GTGGTTCGGCGAATGTACCGTTTTCGTCTTTTCGGACTCATCAGGGAAAGTACACACTTTCCGACGGTGGGTTCGT  
CGACACCTCTCCCCCTCCCAGGTACTATCCCCTTTCAAGGATGTGTTCCCTAGGAGGGTGGGTGTACCTCTTTTG  
GATTGCTCCGGCCTTCCAGGAGAGATAGAGGACGACCTCTCCCCATA

>ELVd L2

GGGTGGTGTGTGCCACCCCTGATGAGACCGAAAGGTCGAAATGGGGTTTCGCCATGGGTCTGGGACTTTAAATTCG  
GAGGATTCGTCTTTAAACGTTCCCTCCAAGAGTCCCTTCCCCACGGCGAATGTACCGTTTCGTCTTTTCGGACTC  
ATCAGGGAAAGTACACACTTTCCGACGGTGGGTTCGTGACACCTCTCCCCCTCCCAGGTACTATCCCCTTTCAA  
GGATGTGTTCCCTAGGAGGGTGGGTGTACCTCTTTTGATTGCTCCGGCCTTCCAGGAGAGATAGAGGACGACCT  
CTCCCCATA

>ELVd L3

GGGTGGTGTGTGCCACCCCTGATGAGACCGAAAGGTCGAAATGGGGTTTCGCCATTTCGGCGAATGTACCGTTTCG  
TCCTTTTCGGACTCATCAGGGAAAGTACACACTTTCCGACGGTGGGTTCGTGACACCTCTCCCCCTCCCAGGTAC  
TATCCCCTTTCAAGGATGTGTTCCCTAGGAGGGTGGGTGTACCTCTTTTGATTGCTCCGGCCTTCCAGGAGAGA  
TAGAGGACGACCTCTCCCCATA

>ELVd L4

GGGTGGTGTGTGCCACCCCTGATGAGACCGAAAGGTCGAAATGGGGTTGTACCGTTTCGTCTTTTCGGACTCATC  
AGGGAAAGTACACACTTTCCGACGGTGGGTTCGTGACACCTCTCCCCCTCCCAGGTACTATCCCCTTTCAAGGA  
TGTGTTCCCTAGGAGGGTGGGTGTACCTCTTTTGATTGCTCCGGCCTTCCAGGAGAGATAGAGGACGACCTCTC  
CCATA

>ELVd R1

GGGTGGTGTGTGCCACCCCTGATGAGACCGAAAGGTCGAAATGGGGTTTCGCCATGGGTCTGGGACTTTAAATTCG  
GAGGATTCGTCTTTAAACGTTCCCTCCAAGAGTCCCTTCCCCAAACCCCTTACTTTGTAAGTGTGGTTCGGCGAAT  
GTACCGTTTTCGTCTTTTCGGACTCATCAGGGAAAGTACACACTTTCCGACGGTGGGTTCGTGACACCTCTCCCC  
CTCCCAGGTACTATCCCCTTTCAAGGATGTGTTCCCTAGGAGGGTGGGTGTACATAGAGGACGACCTCTCCCCAT  
A

>ELVd R2

GGGTGGTGTGTGCCACCCCTGATGAGACCGAAAGGTCGAAATGGGGTTTCGCCATGGGTCTGGGACTTTAAATTCG  
GAGGATTCGTCTTTAAACGTTCCCTCCAAGAGTCCCTTCCCCAAACCCCTTACTTTGTAAGTGTGGTTCGGCGAAT  
GTACCGTTTTCGTCTTTTCGGACTCATCAGGGAAAGTACACACTTTCCGACGGTGGGTTCGTGACCTCTTTTGGA  
TTGCTCCGGCCTTCCAGGAGAGATAGAGGACGACCTCTCCCCATA

>ELVd R3

GGGTGGTGTGTGCCACCCCTGATGAGACCGAAAGGTCGAAATGGGGTTTCGCCATGGGTCTGGGACTTTAAATTCG  
GAGGATTCGTCTTTAAACGTTCCCTCCAAGAGTCCCTTCCCCAAACCCCTTACTTTGTAAGTGTGGTTCGGCGAAT  
GTACCGTTTTCGTCTTTTCGGACTCATCAGGGAAAGTACACACTTTCCGACGGTGGGTTCGTGACATAGAGGACGAC  
CTCTCCCCATA

>ELVd R4

GGGTGGTGTGTGCCACCCCTGATGAGACCGAAAGGTCGAAATGGGGTTTCGCCATGGGTTCGGGACTTTAAATTCG  
GAGGATTCGTCTTTAAACGTTTCTCCAAGAGTCCCTTCCCCAACCCCTTACTTTGTAAGTGTGGTTCGGCGAAT  
GTACCGTTTCGTCTTTTCGGACTCATCAGGGAAAGTACACACTTTCCGACGGTGCCTCCCCATA

>ELVd L1R3

GGGTGGTGTGTGCCACCCCTGATGAGACCGAAAGGTCGAAATGGGGTTTCGCCATCAAACCCCTTACTTTGTAAGT  
GTGGTTCGGCGAATGTACCGTTTCGTCTTTTCGGACTCATCAGGGAAAGTACACACTTTCCGACGGTGGGTTCGT  
CATAGAGGACGACCTCTCCCCATA

>ELVd L2R2

GGGTGGTGTGTGCCACCCCTGATGAGACCGAAAGGTCGAAATGGGGTTTCGCCATGGGTTCGGGACTTTAAATTCG  
GAGGATTCGTCTTTAAACGTTTCTCCAAGAGTCCCTTCCCCACGGCGAATGTACCGTTTCGTCTTTTCGGACTC  
ATCAGGGAAAGTACACACTTTCCGACGGTGGGTTCGTGCACCTCTTTTGGATTGCTCCGGCCTTCCAGGAGAGAT  
AGAGGACGACCTCTCCCCATA

>ELVd L3R1

GGGTGGTGTGTGCCACCCCTGATGAGACCGAAAGGTCGAAATGGGGTTTCGCCATTGGCGAATGTACCGTTTCG  
TCCTTTTCGGACTCATCAGGGAAAGTACACACTTTCCGACGGTGGGTTCGTTCGACACCTTCCCCCTCCAGGTAC  
TATCCCCTTTCAAGGATGTGTTCCCTAGGAGGGTGGGTGTACATAGAGGACGACCTCTCCCCATA

>ELVd L3R3

GGGTGGTGTGTGCCACCCCTGATGAGACCGAAAGGTCGAAATGGGGTTTCGCCATTGGCGAATGTACCGTTTCG  
TCCTTTTCGGACTCATCAGGGAAAGTACACACTTTCCGACGGTGGGTTCGTGCATAGAGGACGACCTCTCCCCATA

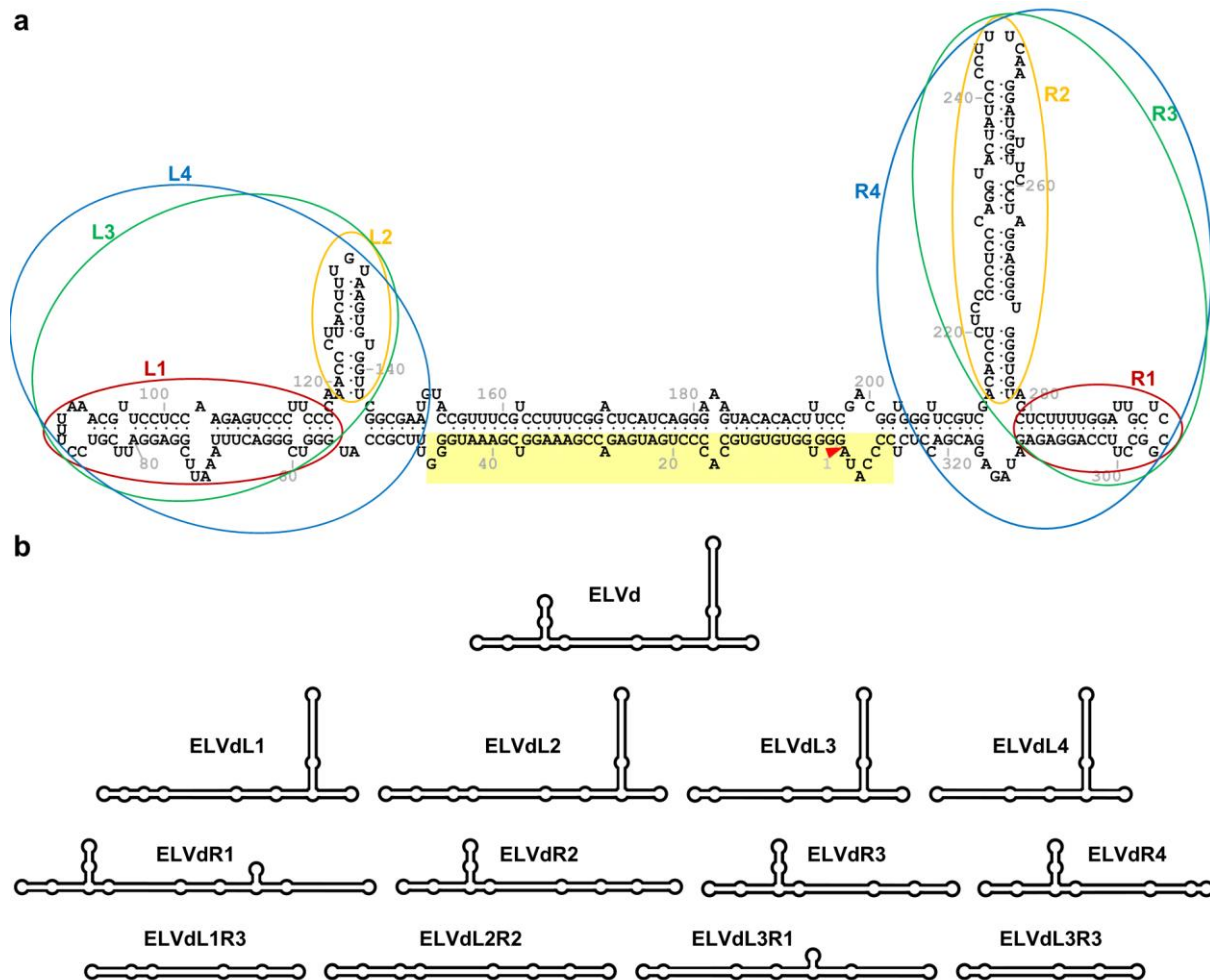

**Figure S9.** ELVd deleted forms assayed in the viroid-derived system to produce recombinant RNA in *E. coli*. Scheme of the deletions created on the ELVd RNA molecule and assayed in the *E. coli* system to overproduce recombinant RNA. (a) Structural domains of the folded ELVd molecule deleted at the left (L1, L2, L3 and L4) and right (R1, R2, R3 and R4) part of the molecule. (b) Schematic representation of full-length ELVd RNA and the resulting ELVd forms with single deletions at the left (ELVd L1, L2, L3 and L4), at the right (ELVd R1, R2, R3 and R4), and with double deletions at both sides (ELVd L1R3, L2R2, L3R1 and L3R3). RNA secondary structures of minimum free energy were calculated using the Mfold web server (<http://unafold.rna.albany.edu/?q=mfold/RNA-Folding-Form>).

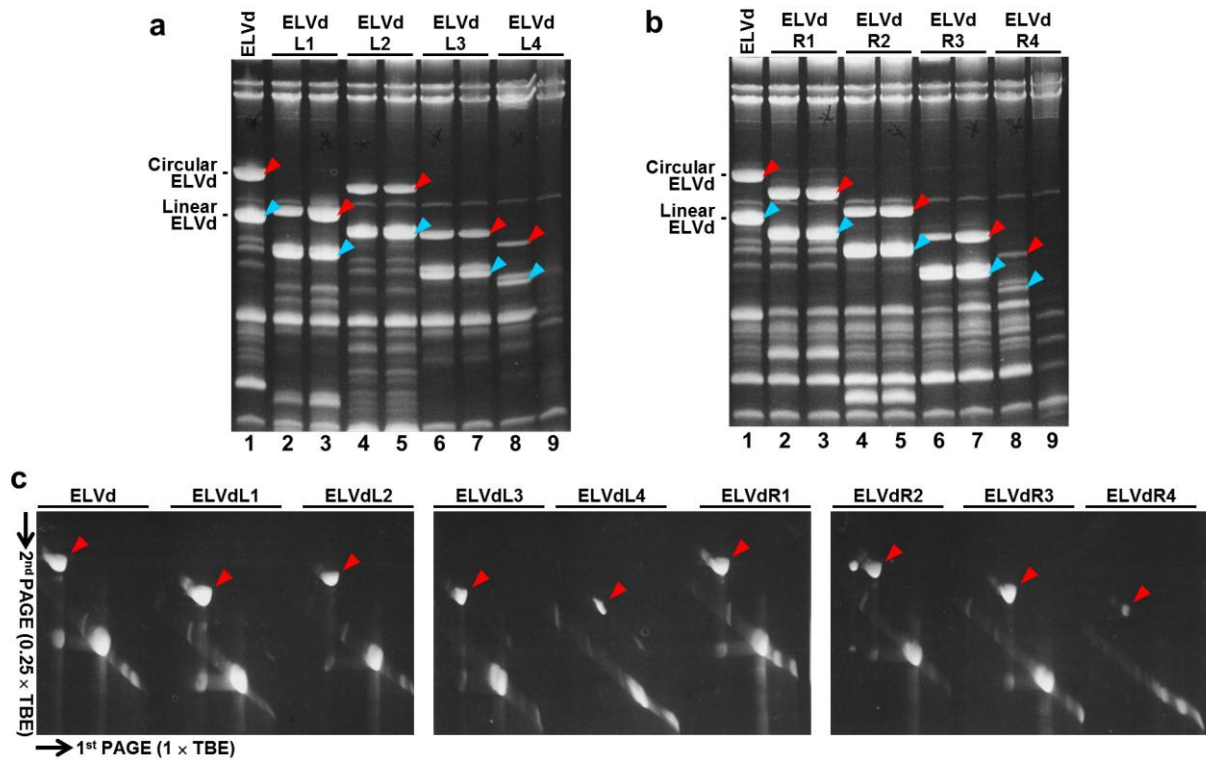

**Figure S10.** Analysis of the RNA that accumulated in *E. coli* that co-expressed eggplant tRNA ligase and deleted forms of ELVd RNA. Aliquots of the cultures were taken at 8 h post-induction of tRNA ligase expression. Purified RNA was separated by single (**a** and **b**) or double denaturing PAGE (**c**) and stained with ethidium bromide. (**a** and **b**) Lanes 1, RNAs from *E. coli* that expressed full-length ELVd. (**a**) Lanes 2 to 9, RNAs from two independent *E. coli* clones that expressed ELVd forms (see [Supplementary Fig. S9](#)) with deletions at the left side of the molecule, as indicated. (**b**) Lanes 2 to 9, RNAs from two independent *E. coli* clones that expressed ELVd forms with deletions at the right side of the molecule, as indicated. The positions of the circular and linear forms of full-length ELVd RNA are indicated on the left of both panels. The positions of the different circular and linear deleted ELVd RNAs are indicated by red and blue arrowheads, respectively. (**c**) RNAs from *E. coli* that expressed full-length ELVd RNA and ELVd deleted forms L1, L2, L3, L4, R1, R2, R3 and R4, as indicated. The directions of migration of the two electrophoretic separations are indicated. The positions of the corresponding circular RNAs are indicated by a red arrowhead. *E. coli* cultures were grown at 37°C in LB medium and induced at DO<sub>600</sub> 0.1 with 0.1 mM IPTG. Each lane contains an aliquot of RNA corresponding to 0.8 ml of culture.

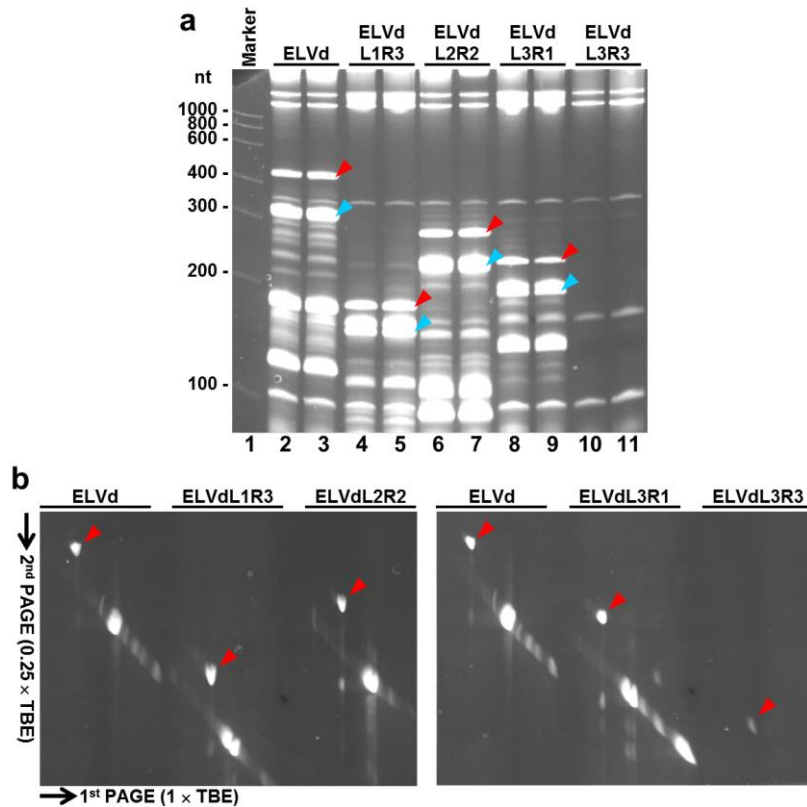

**Figure S11.** Analysis of the RNA that accumulated in *E. coli* that co-expressed eggplant tRNA ligase and double-deleted ELVd RNA forms. Aliquots of the cultures were taken at 8 h post-induction, RNA purified from the cells and separated by single dimension (a) or double dimension (b) denaturing PAGE. Gels were stained with ethidium bromide. (a) Lane 1, RNA marker with the sizes of the standards indicated on the left in nt; lanes 2 to 11, RNAs from two independent *E. coli* clones that expressed full-length ELVd (lanes 2 and 3) and the ELVd deleted forms L1R3 (lanes 4 and 5), L2R2 (lanes 6 and 7), L3R1 (lanes 8 and 9) and L2R2 (lanes 10 and 11). The positions of the corresponding circular and linear RNAs are indicated by red and blue arrowheads, respectively. (b) RNAs from *E. coli* clones that expressed full-length ELVd and ELVd forms with double deletion (L1R3, L2R2, L3R1 and L3R3), as indicated. The directions of migration of the two electrophoretic separations are indicated. The positions of the corresponding circular RNAs are indicated by a red arrowhead. *E. coli* cultures were grown at 37°C in LB medium and induced at DO<sub>600</sub> 0.1 with 0.1 mM IPTG. Each lane contains an aliquot of RNA corresponding to 0.8 ml of culture.

**Figure S12.** Sequence and elements of plasmid p15LtRnlSm used to constitutively express eggplant tRNA ligase in *E. coli*.

```

>p15LtRnlSm (5415 bp)
CGATGCTTCTTTGAGCGAACGATCAAAAATAAGTGCCTTCCCATCAAAAAATATTTCTCAACATAAAAACTTTG
TGTAACTACTTGTAAACGCTGGGGAGACCACAACGGTTTTCCCTCTAGAAATAATTTTGTTTAACTTTAAGAAGGAGA
TATACCATGTGCGTTTCGCATAGGGTCATTTACTCTTTCACTCATTACAACTCTATAATCTCTCTTCTTTA
TCATCTTTGCCTTCTAGAATCTTCTTCCCTTTTCAATCTCCTTTCCTTTACACGTTCTCTTCACTCATGCCAAC
AATCAGGAAAGGGGTGGTTATGAAGGAAAAAATGGCAAGTGAGGCCAAGTTCCAATAGGGTACCAGGCTCGTCT
TCAAATGTGGAACCTGTATCTGCTGCAACTGCTGAAGCCATTACCGACCGTCTAAAAGTCCGTGGATATTACTGAA
AGTGGTGCACAGTCTAGTGTTCAGTCACATCTCTTTCAGTTTGGCAGCGTTGGATTAGCACCCCAGTCACCTGTG
CAACATCAAAAAGTAATCTGGAAACCCAAATCATATGGAACAGTGTCTGGAGCCCCAGTGGTTGAAAGCTGGAAAA
ACACCAGTTGAACAAAAAAGTGTCTTTTTAAGTAAATTATTCAAGGGTAAATTTATTGGAAAAATTTACTGTAGAT
AACTCAACATTCTCGAGAGCCCAAGTAAGGGCCACTTTCTACCCAAAATTTGAGAATGAGAAATCAGATCAGGAG
ATCAGGACAAGGATGATAGAGATGGTCTCCAAAGGCTTTGGCTATAGTCGAGGTCACACTTAAGCATTTCTGGATCT
CTTTTTATGTATGCTGGGCATGAAGGTGGAGCATATGCCAAGAATAGCTTCGGGAATATCTATACTGCCGTTGGC
GTCTTTTGTCTTGGACGGATGTTTTCGTGAGGCATGGGGAATAAGCAAGCAAGAAGCAAGCAGATTCATATGAG
TTTTCTTGAGCGCAATCGTATGTGCATATCAATGGAGTTGGTCACGGCAGTGTGGGGGACCAGGACAACGCCCA
CGAGATGATTATGCGGTTGTGACTGCAGTCACGGAGTTGGGAAATGGAAAACCAACTTTCTATTCAACTCCCAGAT
GTAATTGCTTTTTGTCAGGGAATGGCGATTACCAACAAATCATGTATGGCTGTTCTCAACAAGGAAAATCAGTGACT
TCCTTCTTTGCTGCGTATGATGCACCTTTCGAGGAAGGTACAGCAACCACCGTTTTCGAGGCTCTCAGCGAAGTT
GCTGATATTTCTGTACCTGGATCAAAAGACCATATAAAAGTGCAGGGTGAAATTTTGGAGGGTCTCGTGGCCCGC
ATCGTAAAACGTGAGAGCTCAGAGCATATGGAGCGGGTTCTGAGAGATTTTCTCCTCCGCCATCAGAGGGTGAG
GGTTTGGACCTGGGACCTACGTTACGTGAAATTTGTGCTGCAACAGATCAGAAAAGCAGCAAATAAAGGCACTT
CTTCAGAGTGCTGGCACGGCTTTCTGCCCGAATTTATTTGGACTGGTTTGGAGATGAAAACCTCGTTTACATTC
AGAAATGCTGATCGATCTGTTGTCTCAAAGTCTTACAATCACATCCTGCTGATCTTTATACAGGAAAAATACAG
GAAATGGTTTCGCTTGATGAGGGAAAAGCGCTTTTCTGCTGCTTTCAAGTGTCAATTATAACTTACATAAAAATTAAT
GATGTATCGAGTAACAACCTGCCTTTCAAATGGTGATCCATGTATATAGTGATTCAGGCTTCCGCCGGTACCAG
AAAGAGATGAGGCACAAACCAGGACTATGGCCTTTGTATCGAGGCTTTTTTGTGACCTGGATTTATTCAAGGTC
AATGAGAAGAAAACCTGCTGAAATGGCAGGAAGCAACAATCAAATGGTAAAAAATGTGGAAGAGGACAACAGTTTA
GCTGATGAAGATGCAAATCTGATGGTCAAGATGAAATTTCTTACTTACAAGTTGAGAATTTTTTGTATCCGTAAT
GGCTTGTGCACTCTTTTCAAAGAAGGACCTTCTGCGTATAAGTCTTATTACCTGAGGCAAATGAAAATTTGGAAT
ACTTTCAGCAGCCAAGCAACGGAACCTCAGCAAGATGCTTGTATGTAATGGCAGTATATACGCAAGAAAATATGGG
AACAAACCATTGTATCATCATCCACATCACTAAGTGAAGCTGAGCCTTTCTTGAACAATATGCAAAGCCTATGCCA
CAAAATCATGCTTTGATAGGATCTGCTGGAATTTTGTCAAAGTTGAAGATTTTCATGGCTATTTGTGAAGGAGAA
GATGAAGAGGGTGATCTCGAGCCTGCGAAAGATATTGCTCCTTCAAGCCCTAGTATTTCCACCAGAGACATGGTG
GCAAAGAATGAGGGTCTCATTATTTTTCTTTCCAGGAATACCAGGTTGTGCTAAAATCTGCACCTTTGTAAGGAAATA
CTGAATGCTCCAGGAGGGCTTGGAGATGATCGACCAGTTAACAGTTTAAATGGGTGATCTTATTAAAGGTAGATAT
TGGCAAAAAGTTGCTGATGAACGTCGAAGAAAACCTTACTCGATCATGCTTGCTGACAAGATGCACCAAATGAG
GAAGTATGAAAACAAATTTGAGAACATGTGCCTAAGCACCAGGATCTGCTATTCCAGTTATACCTGATTCAGAA
GGAATGAAACTAATCCATTCTCTATTGATGCACCTTTCGGTTTTTATATTCCGAGTACTTCACCGTGTCAATCAT
CCGGGAAATCTTGACAAGTCATCTCAAATGCTGGATATGTGATGCTTATGTTTTATCACCTTATGATGGAAG
AGCCGTCCAGGAGTTCGAGAGTGAGCTTATTGAACGTTTTTGGATCGCTTGTGAGAATTCCTGTACTGAAACCTGAG
AGGTCTCCTCTTCCGATTCTGTGAGGTCTATTATCGAGGAGGGACTCAGTCTGTACAGACTTCATACAACGAAA
CATGGAAGATTGGAGTCTACAAAAGGGACATATGTACAAGAGTGGGTAAAATGGGAGAAAGCAATTGAGAGATATT
CTACTTGGAAATGCAGACTATCTCAATTCAAATACAGGTTCCATTTGAAATTTGCCGTTAAAAGAAAGTCCCTTGAACAA
CTGAAAGTTATTGCGAGGGGGCGAATATGCAGTGCCTGCTGAGAAGAGGAAGCTAGGATCCATTGTATTCGCCGCT
ATCAGCCTGCCAGTTCAGAAATCTAGGTCTTCAAATGATCTAGCAAAGAAAGATCCAAAGGTTGGCGATTTTC
ATTAAGGACAAGAGCATGGAGAGCAGCATTGAGAAGGCCATCTTACCCTGGCTCACAAGAGAAGTACCGGTGTC
ACTGCAGTTGCCAATTACGGTTCTTTCTTTCATCAAAGGTTGCCAGTAGACGTGGCTGCTTTGTTGTTCTCCGAT
AAATTGGCTGCACTAGAAGCTGAGCCTGGCTCTGTTGAAGGTGAAAAGATCAATTTCAAAAACCTCATGCCCCAT
ATCACATTATGGTCTGGTGCAGGAGTTGCCGAAAAGATGCCAATACACTACCACAGTTACTTTCCCAAGGGGAAG
GCTACCCGCATTGATATAAATCCACCGGTCACTATAACTGGCACTCTCGAATTTCTTTCACCACCACCACCACCAC
TGAGATCCGGCTGCTAACAAAGCCCGAAAGGAAGCTGAGTTGGCTGCTGCCACCCTGAGCAATAACTAGCATAA
CCCCTTGGGGCCTCTAAACGGGTCTTGAAGGGTTTTTTGCTGAAAGGAGATCTGGCGGGGCCGCCTAGCGGAG
TGTATACTGGCTTACTATGTTGGCACTGATGAGGGTGTGAGTGAAGTGTTCATGTGGCAGGAGAAAAAGGCTG
CACCGGTGCGTCAGCAGAATATGTGATACAGGATATATTCCGCTTCTCGCTCACTGACTCGCTACGCTCGGTCCG
TTCGACTGCGGCGAGCGGAAATGGCTTACGAACGGGGCGGAGATTTCTGGAAGATGCCAGGAAGATACTTAAACA
GGGAAGTGAGAGGGCCGCGGCAAGCCGTTTTTCCATAGGCTCCGCCCCCTGACAAGCATCAGGAAATCTGACG
CTCAAATCAGTGGTGGCGAAACCCGACAGGACTATAAAGATACCAGGCTTTCCCCCTGGCGCTCCCTCGTGCC

```



CTCTCCTGTTCCCTGCCTTTTCGGTTTACCGGTGTCATTCCGCTGTTATGGCCGCGTTTGTCTCATTCCACGCCTGA  
CACTCAGTTCCGGGTAGGCAGTTTCGCTCCAAGCTGGACTGTATGCACGAACCCCCCGTTTCAGTCCGACCGCTGCC  
CCTTATCCGGTAACTATCGTCTTGAGTCCAACCCGAAAGACATGCAAAAAGCACCCTGGCAGCAGCCACTGGTA  
ATTGATTTAGAGGAGTTAGTCTTGAAGTCATGCGCCGGTTAAGGCTAAACTGAAAAGGACAAGTTTTGGTGACTGC  
GCTCCTCCAAGCCAGTTACCTCGGTTCAAAGAGTTGGTAGCTCAGAGAACCTTCGAAAAACCGCCCTGCAAGGCG  
GTTTTTTCGTTTTTCAGAGCAAGAGATTACGCGCAGACCAAAACGATCTCAAGAAGATCATCTTATTAATACGCC  
CCGCCCTGCCACTCATCGCAGTACTGTTGTAATTCATTAAGCATTCTGCCGACATGGAAGCCATCACAGACGGCA  
TGATGAACCTGAATCGCCAGCGGCATCAGCACCTTGTCGCCTTGCGTATAATATTTGCCCATGGTGAAAACGGGG  
GCGAAGAAGTTGTCCATATTGGCCACGTTTAAATCAAACTGGTGAACTCACCCAGGGATTGGCTGAGACGAAA  
AACATATTCTCAATAAACCCCTTTAGGGAAATAGGCCAGGTTTTACCGTAACACGCCACATCTTGCGAATATATG  
TGTAGAAACTGCCGAAATCGTCGTGGTATTCAGTCCAGAGCGATGAAAACGTTTCAGTTTGCTCATGGAAAACG  
GTGTAACAAGGGTGAACACTATCCCATATCACCAGCTCACCGTCTTTCATTGCCATACGGAATTCCGGATGAGCA  
TTCATCAGGCGGGCAAGAATGTGAATAAAGGCCGATAAACTTGTGCTTATTTTTCTTTACGGTCTTTAAAAAG  
GCCGTAATATCCAGCTGAACGGTCTGGTTATAGGTACATTGAGCAACTGACTGAAATGCCTCAAAATGTTCTTTA  
CGATGCCATTGGGATATATCAACGGTGGTATATCCAGTGATTTTTTTCTCCATTTTAGCTTCCTTAGCTCCTGAA  
AATCTCGATAACTCAAAAAATACGCCCGGTAGTGATCTTATTCATTATGGTGAAAGTTGGAAAGCCGGGGCGGC  
GGCCGC

*E. coli* **murein lipoprotein promoter** is in red. Eggplant tRNA ligase (JX0225157) in black with the theoretical amino-terminal **transit peptide** on green background and the carboxy-terminal **hexahistidine tag** in blue. **Stop codon** in red. **T7 bacteriophage terminator** on red background. **p15A replication origin** in gray and **chloramphenicol resistance gene** (reverse orientation) in blue (*promoter* in italics).

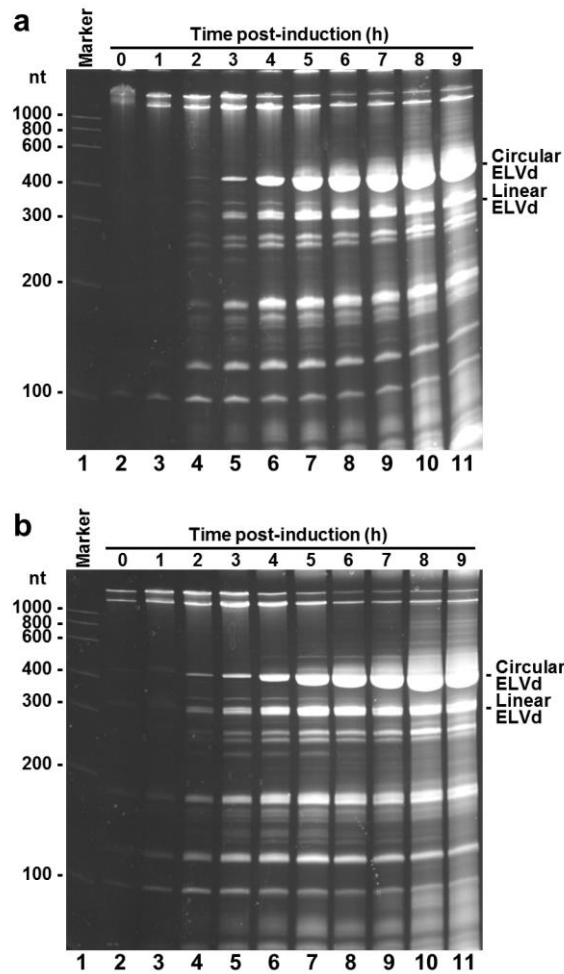

**Figure S13.** Time-course analysis of the RNA that accumulated in *E. coli* that co-expressed ELVd RNA and eggplant tRNA ligase under the control of (a) IPTG-inducible T7 bacteriophage RNA polymerase and (b) constitutive *E. coli* murein lipoprotein promoters. Aliquots from the cultures were taken at different time points, and RNAs purified and separated by denaturing PAGE. Gels were stained with ethidium bromide. Lanes 1, RNA marker with the sizes of the standards indicated on the left in nt; lanes 2 to 11, RNAs from aliquots taken at 0, 1, 2, 3, 4, 5, 6, 7, 8 and 9 h post-induction. The positions of the circular and linear ELVd RNAs are indicated on the right. *E. coli* cultures were grown at 37°C in TB medium and induced with 0.1 mM IPTG (a) or not induced (b) at OD<sub>600</sub> 0.1. Each lane contains an aliquot of RNA corresponding to 0.2 ml of culture.

**Figure S14.** Sequence and elements of plasmids pLELVd-Spinach and pLELVdL1R3-Spinach.

```

>pLELVd-Spinach (2148 bp)
CGATGCTTCTTTGAGCGAACGATCAAAAATAAGTGCCTTCCCATCAAAAAATATTCTCAACATAAAAACTTTG
TGTAAACTTTGTAACGCTGCCCATAGGGTGGTGTGTGCCACCCCTGATGAGACCGAAAGGTCGAAATGGGGTTT
CGCCATGGGTGCGGACTTTAAATTCGGAGGATTCGTCTTTAAACGTTCCCTCCAAGAGTCCCTTCCCCAACCCCT
TACTTTGTAAGTGTGGTTCGGCGAATGTACCGTTTCGTCTTTTCGGACTCATCAGGGAAAGTACACACTTTCCGA
CGGTGGGTTTCGTGACACCTCTCCCCCTCCCAGGTACTATCCCCTTGACGCAACTGAATGAAATGGTGAAGGACG
GGTCCAGGTGTGGCTGCTTCGGCAGTGCAGCTTGTGAGTAGAGTGTGAGCTCCGTAAGTGTGCGCTTCAAGG
ATGTGTTCCCTAGGAGGGTGGGTGTACCTCTTTTGGATTGCTCCGGCTTCCAGGAGAGATAGAGGACGACCTCT
CCCCATAGGGTGGTGTGTGCCACCCCTGATGAGACCGAAAGGTCGAAATGGGGGAAATCATCCTTAGCGAAAGCT
AAGGATTTTTTTTATCTGAAATGCGTTGCTGGCGTTTTTCCATAGGCTCCGCCCCCTGACGAGCATCACAAAA
TCGACGCTCAAGTCAGAGGTGGCGAAACCCGACAGGACTATAAAGATACCAGGCGTTTCCCCCTGGAAGCTCCCT
CGTGCGCTCTCCTGTTCCGACCCCTGCCGCTTACCGGATACCTGTCCGCTTTCTCCCTTCGGGAAGCGTGGCGCT
TTCTCATAGCTCACGCTGTAGGTATCTCAGTTCGGTGTAGGTGCTCGTCCGCTCCAAGCTGGGCTGTGTGCACGAAC
CCCCGTTAGCCCCGACCGCTTATCCGGTAACTATCGTCTTGAGTCCAACCCGGTAAAGACAGCACTTATC
GCCACTGGCAGCAGCCACTGGTAACAGGATTAGCAGAGCGAGGTATGTAGGCGGTGCTACAGAGTTCTTGAAGTG
GTGGCCTAACTACGGCTACACTAGAAGGACAGTATTTGGTATCTGCGCTCTGCTGAAGCCAGTTACCTTCCGAAA
AAGAGTTGGTAGCTCTTGATCCGGCAAACAAACCACCGCTGGTAGCGGTGGTTTTTTTTGTTTGAAGCAGCAGAT
TACGCGCAGAAAAAAGGATCTCAAGAAGATCCTTTTACCAATGCTTAATCAGTGAGGCACCTATCTCAGCGAT
CTGTCTATTTTCGTTTCATCCATAGTTGCCTGACTCCCCGTCGTGTAGATAACTACGATACGGGAGGGCTTACCATC
TGGCCCCAGTGTGCAATGATACCGCGAGAGCCACGCTCACCGGCTCCAGATTTATCAGCAATAAACCAGCCAGC
CGGAAGGGCCGAGCGCAGAAGTGGTCCGCAACTTTATCCGCTCCATCCAGTCTATTAATTGTTGCCGGGAAGC
TAGAGTAAGTAGTTCGCCAGTTAATAGTTTGCGCAACGTTGTTGCCATTGCTACAGGCATCGTGGTGTACGCTC
GTCGTTTGGTATGGCTTCATTCAGCTCCGGTTCCCAACGATCAAGGCGAGTTACATGATCCCCATGTTGTGCAA
AAAAGCGGTTAGCTCCTTCGGTCCGATCGTTGTGAGAAGTAAGTTGGCCGAGTGTATCACTCATGGTTAT
GGCAGCACTGCATAATTCTTACTGTATGCCATCCGTAAGATGCTTTTTCTGTGACTGGTGAGTACTCAACCAA
GTCATTCTGAGAATAGTGTATGCGGCGACCGAGTTGCTCTTGCCCGGCTCAATACGGGATAATACCGCGCCACA
TAGCAGAACTTTAAAGTGTCTATCATTGGAAAACGTTCTTCCGGGGCGAAAACCTCTCAAGGATCTTACCGCTGTT
GAGATCCAGTTCGATGTAACCCACTCGTGCACCAACTGATCTTCAGCATCTTTACTTTTACCAGCGTTTCTGG
GTGAGCAAAAACAGGAAGGCAAAATGCCGCAAAAAGGGAATAAGGGCGACACGGAAATGTTGAATACTCATACT
CTTCCTTTTTCAATATTATTGAAGCATTATCAGGGTATTGTCTCAT

```

*E. coli* **murein lipoprotein promoter** is in red and **ELVd** cDNA (C327 to G46 of AJ536613) is in black with the repeated hammerhead ribozyme domain on yellow background. cDNA coding for the RNA aptamer **Spinach** in green inserted between T245 and T246 of ELVd cDNA. Ribozymes self-cleavage sites are underlined. *E. coli* ribosomal **rrnC terminator** is in fuchsia. **pUC replication origin** is in gray and **ampicillin resistance gene** (inverse orientation) on gray background (**promoter** on dark gray background).

```

>pLELVdL3R1-Spinach (2030 bp)
CGATGCTTCTTTGAGCGAACGATCAAAAATAAGTGCCTTCCCATCAAAAAATATTCTCAACATAAAAACTTTG
TGTAAACTTTGTAACGCTGCCCATAGGGTGGTGTGTGCCACCCCTGATGAGACCGAAAGGTCGAAATGGGGTTT
CGCCATTCGGCGAATGTACCGTTTCGTCTTTTCGGACTCATCAGGGAAAGTACACACTTTCCGACGGTGGGTTCG
TCGACACCTCTCCCCCTCCCAGGTACTATCCCCTTGACGCAACTGAATGAAATGGTGAAGGACGGGTCCAGGTGT
GGCTGCTTCGGCAGTGCAGCTTGTGAGTAGAGTGTGAGCTCCGTAAGTGTGCGCTTCAAGGATGTGTTCCCT
AGGAGGGTGGGTGTACATAGAGGACGACCTCTCCCCATAGGGTGGTGTGTGCCACCCCTGATGAGACCGAAAGG
TCGAAATGGGGGAAATCATCCTTAGCGAAAGCTAAGGATTTTTTTTATCTGAAATGCGTTGCTGGCGTTTTTCCAT
AGGCTCCGCCCCCTGACGAGCATCACAAAAATCGACGCTCAAGTCAGAGGTGGCGAAACCCGACAGGACTATAA
AGATAACAGGCGTTTCCCCCTGGAAGCTCCCTCGTGCGCTCTCCTGTTCCGACCCCTGCCGCTTACCGGATACCTG
TCCGCTTTTCTCCCTTCGGGAAGCGTGGCGCTTTCTCATAGCTCACGCTGTAGGTATCTCAGTTCGGTGTAGGTC
GTTTCGCTCCAAGCTGGGCTGTGTGCACGAACCCCCCGTTTCCAGCCGACCGCTGCGCCTTATCCGGTAACTATCGT
CTTGAGTCCAACCCGGTAAAGACACGACTTATCGCCACTGGCAGCAGCCACTGGTAAACAGGATTAGCAGAGCGAGG
TATGTAGGCGGTGCTACAGAGTTCTTGAAGTGGTGGCCTAACTACGGCTACACTAGAAGGACAGTATTTGGTATC
TGCCTCTGCTGAAGCCAGTTACCTTCGGAAAAAGAGTTGGTAGCTCTTGATCCGGCAAACAAACCACCGCTGGT
AGCGGTGGTTTTTTTTGTTTGAAGCAGCAGATTACGCGCAGAAAAAAGGATCTCAAGAAGATCCTTTTACCAA
TGCTTAATCAGTGAGGCACCTATCTCAGCGATCTGTCTATTTTCGTTTCATCCATAGTTGCCTGACTCCCCGTCGTG
TAGATAACTACGATACGGGAGGGCTTACCATCTGGCCCCAGTGTGCAATGATACCGCGAGAGCCACGCTCACCG

```

```
GCTCCAGATTTATCAGCAATAAACCAGCCAGCCGGAAGGGCCGAGCGCAGAAGTGGTCCTGCAACTTTATCCGCC
TCCATCCAGTCTATTAATTGTTGCCGGGAAGCTAGAGTAAGTAGTTCGCCAGTTAATAGTTTGCACAACGTTGTT
GCCATTGCTACAGGCATCGTGGTGTACGCTCGTTCGTTTGGTATGGCTTCATTCAGCTCCGGTTCCCAACGATCA
AGGCGAGTTACATGATCCCCATGTTGTGCAAAAAAGCGGTTAGCTCCTTCGGTCCTCCGATCGTTGTCAGAAGT
AAGTTGGCCGCAGTGTATCACTCATGGTTATGGCAGCACTGCATAATTCTCTTACTGTCATGCCATCCGTAAGA
TGCTTTTCTGTGACTGGTGAGTACTCAACCAAGTCATTCTGAGAATAGTGTATGCGGCGACCGAGTTGCTCTTGC
CCGGCGTCAATACGGGATAATACCGCGCCACATAGCAGAACTTTAAAAGTGCTCATCATTGGAAAACGTTCTTCG
GGGCGAAAACCTCTCAAGGATCTTACCGCTGTTGAGATCCAGTTCGATGTAACCCACTCGTGCACCCAACCTGATCT
TCAGCATCTTTTACTTTTACCAGCGTTTCTGGGTGAGCAAAAACAGGAAGGCAAAATGCCGCAAAAAGGGAATA
AGGGCGACACGGAAATGTTGAATACTCATACTCTTCCTTTTTCAATATTATTGAAGCATTATCAGGGTTATTGT
CTCAT
```

*E. coli* **murein lipoprotein promoter** is in red and **ELVd L3R1** cDNA (see [Supplementary Dataset 8](#)) is in black with the repeated hammerhead ribozyme domain on yellow background. cDNA coding for the RNA aptamer **Spinach** in green inserted between T245 and T246 of ELVd-AJ536613 cDNA. Ribozymes self-cleavage sites are underlined. *E. coli* ribosomal **rrnC terminator** is in fuchsia. **pUC replication origin** is in gray and **ampicillin resistance gene** (inverse orientation) on gray background (**promoter** on dark gray background).

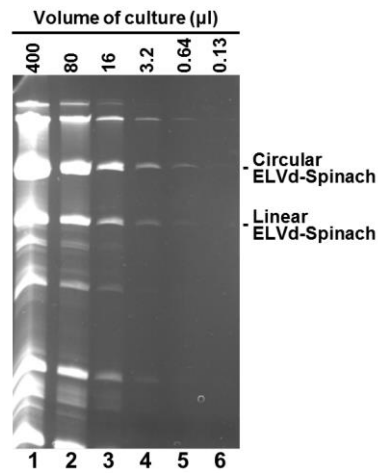

**Figure S15.** Quantification of the chimeric ELVd-Spinach RNA produced with the viroid-derived system in *E. coli*. The RNA extracted from an aliquot of the culture taken at 12 h post-induction (see Fig. 3a) was subjected to serial dilutions. Samples were separated by denaturing PAGE. The gel was stained with ethidium bromide and the intensities of the bands compared with those in a gel photographed in the same conditions containing known amounts of an RNA standard (*E. coli* 5S rRNA, Supplementary Fig. S7b). Lanes 1 to 6, serial dilutions of the RNA corresponding to 400, 80, 16, 3.2, 0.64 and 0.13  $\mu$ l of the original culture, respectively. The positions of the circular and linear ELVd-Spinach RNAs are indicated on the right. *E. coli* cultures were grown at 37°C in TB medium and induced with 0.1 mM ITPG at DO<sub>600</sub> 0.1.

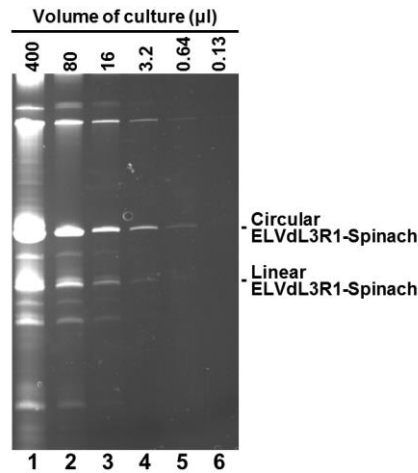

**Figure S16.** Quantification of the chimeric ELVd L3R1-Spinach RNA produced in *E. coli* using the viroid-derived system. The RNA extracted from the aliquot of the *E. coli* culture taken at 12 h post-induction was subjected to 1/5 serial dilutions and separated by denaturing PAGE. The gel was stained with ethidium bromide and the intensities of the bands compared with those in a gel photographed in the same conditions containing known amounts of an RNA standard (*E. coli* 5S rRNA, [Supplementary Fig. S7b](#)). Lanes 1 to 6, RNAs corresponding to 400, 80, 16, 3.2, 0.64 and 0.13  $\mu$ l of the original culture, respectively. The positions of the circular and linear ELVdL3R1-Spinach RNAs are indicated on the right.

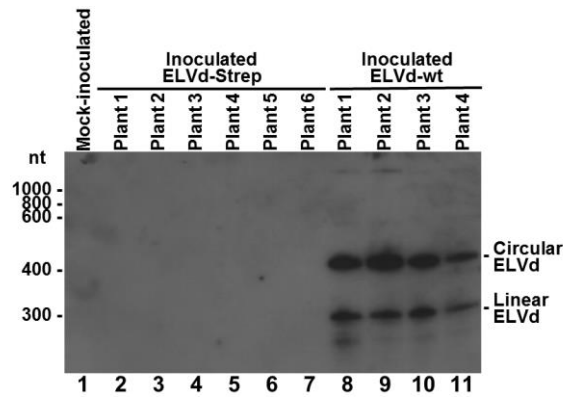

**Figure S17.** Infectivity of chimeric ELVd-Spinach RNA. Eggplants were mock-inoculated or inoculated with chimeric ELVd-Spinach or wild-type ELVd RNA by means of *Agrobacterium tumefaciens*. Total RNAs were purified from systemic tissue of inoculated plants 45 days post-inoculation, separated by denaturing PAGE, transferred to a membrane and hybridized with an ELVd-specific radioactive RNA probe. The membrane was finally autoradiographed. Lane 1, RNA from a mock-inoculated eggplant; lanes 2 to 7, RNAs from 6 independent eggplants agroinoculated with ELVd-Spinach; lanes 8 to 11, RNAs from 4 independent eggplants agroinoculated with wild-type ELVd. The positions and sizes (in nt) of RNA markers are indicated on the left and the positions of monomeric circular and linear ELVd RNAs on the right of the panel.

**Figure S18.** Sequences and elements of plasmids pLELVd-hairpin 100, 80, 60 and 40.

>pLELVd-hairpin 100 (2150 bp)

CGATGCTTCTTTGAGCGAACGATCAAAAATAAGTGCCTTCCCATCAAAAAATATTCTCAACATAAAAACTTTG  
 TGTAACTACTTGTAAACGCTGCCCATAGGGTGGTGTGTGCCACCCCTGATGAGACCGAAAGGTCGAAATGGGGTTT  
 CGCCATGGGTCGGGACTTTAAATTCGGAGGATTTCGTCTTTAAACGTTCCCTCCAAGAGTCCCTTCCCCAACCCCT  
 TACTTTGTAAAGTGTGGTTCGGCGAATGTACCGTTTCGTCTTTCCGACTCATCAGGGAAAAGTACACACTTTCCGA  
 CGGTGGGTTTCGTTCGACACCTCTCCCCCTCCCAGGTAATATCCCTTTCGCAATTTGTTTTTCGTATTTGGATACCTT  
 CTTCAAGGTTGGTTATGGGTATACTTCATACCAACCTTGAAGAAGGTATCCAAATACGAAAACAAATTCGCTCAA  
 GGATGTGTTCCCTAGGAGGGTGGGTGTACCTCTTTTGGATTGCTCCGGCCTTCCAGGAGAGATAGAGGACGACCT  
 CTCCCATAGGGTGGTGTGTGCCACCCCTGATGAGACCGAAAGGTCGAAATGGGGGAAATCATCCTTAGCGAAAG  
 CTAAGGATTTTTTTATCTGAAATGCGTTGCTGGCGTTTTTCCATAGGCTCCGCCCCCTGACGAGCATCACAAA  
 AATCGACGCTCAAGTCAGAGGTGGCGAAACCCGACAGGACTATAAAGATACCAGGCGTTTCCCCCTGGAAGCTCC  
 CTCGTGCGCTCTCCTGTTCCGACCTTCCCGCTTACCGGATACCTGTCCGCTTTCCTCCCTTCGGAAGCGTGGCG  
 CTTTCTCATAGCTCACGCTGTAGGTATCTCAGTTCGGTGTAGGTCGTTTCGCTCCAAGCTGGGCTGTGTGCACGAA  
 CCCCCGTTTCAGCCCGACCGCTGCGCCTTATCCGGTAACATATCGTCTTGAGTCCAACCCGGTAAGACACGACTTA  
 TCGCCACTGGCAGCAGCCACTGGTAACAGGATTAGCAGAGCGAGGTATGTAGGCGGTGCTACAGAGTTCTTGAAG  
 TGGTGGCCTAACTACGGCTACACTAGAAGGACAGTATTTGGTATCTGCGCTCTGCTGAAGCCAGTTACCTTCGGA  
 AAAAGAGTTGGTAGCTCTTGATCCGGCAAACAAACCACCGCTGGTAGCGGTGGTTTTTTTTGTTTGAAGCAGCAG  
 ATTACGCGCAGAAAAAAGGATCTCAAGAAGATCCTTTTACCAATGCTTAATCAGTGAGGCACCTATCTCAGCG  
 ATCTGTCTATTTTCGTTTCATCCATAGTTGCCTGACTCCCCGTCGTGTAGATAACTACGATACGGGAGGGCTTACCA  
 TCTGGCCCCAGTGTGCAATGATACCGCGAGAGCCACGCTCACCGGCTCCAGATTTATCAGCAATAAACCAGCCA  
 GCCGGAAGGGCCGAGCGCAGAAGTGGTCCTGCAACTTTATCCGCTCCATCCAGTCTATTAATTGTTGCCGGGAA  
 GCTAGAGTAAGTAGTTCGCCAGTTAATAGTTTGCGCAACGTTGTTGCCATTGCTACAGGCATCGTGGTGTACCGC  
 TCGTCGTTTTGGTATGGCTTCATTCAGCTCCGGTTCCCAACGATCAAGGCGAGTTACATGATCCCCCATGTTGTGC  
 AAAAAAGCGGTTAGCTCCTTCGGTCCCTCCGATCGTTGTGCAAGTAAGTTGGCCGAGTGTATCACTCATGGTT  
 ATGGCAGCACTGCATAATTCTCTTACTGTCATGCCATCCGTAAGATGCTTTTTCTGTGACTGGTGAGTACTCAACC  
 AAGTCATTCTGAGAATAGTGTATGCGGCGACCGAGTTGCTCTTGCCCGGCTCAATACGGGATAATACCGGCCA  
 CATAGCAGAACTTAAAAGTGTCTCATCATTGGAAAACGTTCTTCGGGGCGAAAACCTCTCAAGGATCTTACCGCTG  
 TTGAGATCCAGTTCGATGTAACCCACTCGTGCACCCAACTGATCTTCAGCATCTTTACTTTCACCAGCGTTTCT  
 GGGTGAGCAAAAACAGGAAGGCAAAATGCCGCAAAAAGGGAATAAGGGCGACACGGAAATGTTGAATACTCATA  
 CTCTTCCTTTTTCAATATTATTGAAGCATTTATCAGGGTTATTGTCTCAT

*E. coli* **murein lipoprotein promoter** is in red and **ELVd** cDNA (C327 to G46 of AJ536613) is in black with the repeated hammerhead ribozyme domain on yellow background. cDNA coding for the **100-nt-long hairpin** structure in blue inserted between T245 and T246 of ELVd cDNA. The sequence corresponding to the **16-nt loop** is underlined. Ribozymes self-cleavage sites are underlined. *E. coli* ribosomal **rrnC terminator** is in fuchsia. **pUC replication origin** is in gray and **ampicillin resistance gene** (inverse orientation) on gray background (**promoter** on dark gray background).

In pLELVd-hairpin 80, 60 and 40, the sequences of the cDNAs coding for the different hairpins of 80, 60 and 40 nt are:

>pLELVd-hairpin 80  
 TTTTCGTATTTGGATACCTTCTTCAAGGTTGGTTATGGGTATACTTCATACCAACCTTGAAGAAGGTATCCAAATACGAAA

>pLELVd-hairpin 60  
 GGATACCTTCTTCAAGGTTGGTTATGGGTATACTTCATACCAACCTTGAAGAAGGTATCC

>pLELVd-hairpin 40  
 TTCAAGGTTGGTTATGGGTATACTTCATACCAACCTTGAA



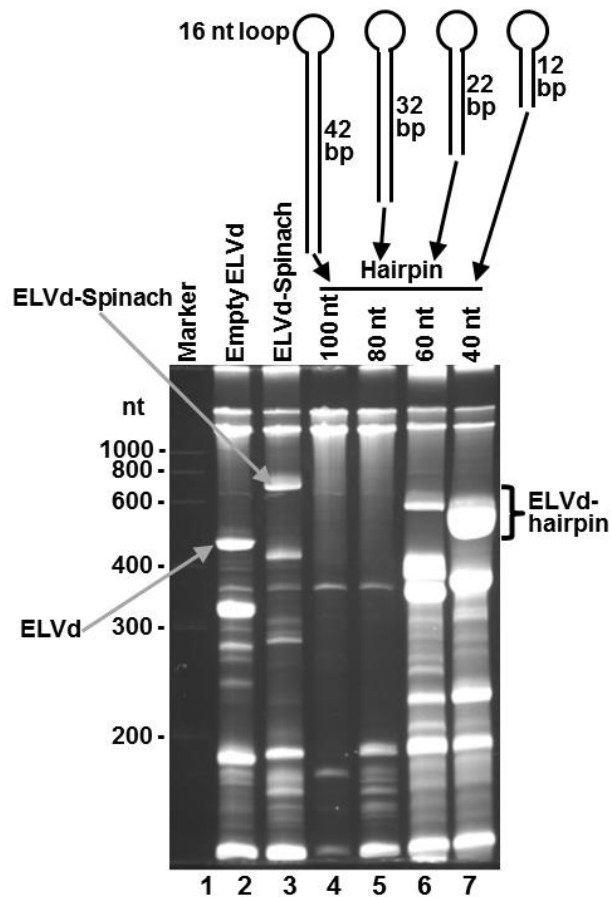

**Supplementary Fig. S19.** Production of recombinant RNAs that included extended hairpin structures using the viroid-derived system in *E. coli* BL21(DE3). RNAs were extracted from aliquots of *E. coli* cultures taken at 15:30 h post-inoculation. RNAs were separated by denaturing PAGE and stained with ethidium bromide. Lane 1, RNA marker with the sizes of the standards indicated on the left in nt; lanes 2 to 7, RNAs from *E. coli* transformed to express empty ELVd (lane 2), ELVd-Spinach (lane 3) and different ELVd forms that included hairpin RNAs of 100, 80, 60 and 40 nt as indicated (lanes 4 to 7). All *E. coli* were co-transformed with plasmid p15LtRnlSm. The positions of the circular empty ELVd and ELVd-Spinach are indicated on the left. The positions of some ELVd-hairpin RNAs are indicated on the right. *E. coli* cultures were grown at 37°C in TB medium. Each lane contains an aliquot of RNA corresponding to 0.2 ml of culture.

**Figure S20.** Sequence and element of plasmid pLELVd-crRNA.

```

>pLELVd-crRNA (2115 bp)
CGATGCTTCTTTGAGCGAACGATCAAAAAATAAGTGCCTTCCCATCAAAAAATATTTCTCAACATAAAAACTTTG
TGTAACTTTGTAACGCTGCCCATAGGGTGGTGTGTGCCACCCCTGATGAGACCGAAAGGTCGAAATGGGGTTT
CGCCATGGGTGGGACTTTAAATTCGGAGGATTTCGTCTTTTAAACGTTTCTCCAAGAGTCCCTTCCCCAAACCTT
TACTTTGTAAGTGTGGTTCGGCGAATGTACCGTTTCGTCTTTTCGGACTCATCAGGGAAAAGTACACACTTTCCGA
CGGTGGGTTCGTGACACCTCTCCCCCTCCCAGGTACTATCCCTTTAATTTCTACTAAGTGTAGATCTGATGGT
CCATGTCTGTTACTCTAATTTCTACTAAGTGTAGATTC AAGGATGTGTTCCCTAGGAGGGTGGGTGTACCTCTTT
TGGATTGCTCCGGCCTTCCAGGAGAGATAGAGGACGACCTCTCCCATAGGGTGGTGTGTGCCACCCCTGATGAG
ACCGAAAGGTCGAAATGGGGGAAATCATCTTAGCGAAAGCTAAGGATTTTTTTTATCTGAAATGCGTTGCTGGC
GTTTTTCCATAGGCTCCGCCCCCTGACGAGCATCACAAAAATCGACGCTCAAGTCAGAGGTGGCGAAACCCGAC
AGGATATAAAGATACCAGCGGTTTTCCCCCTGGAAGCTCCCTCGTGCCTCTCTCTGTTCCGACCTTCCCGCTTAC
CGGATACCTGTCCGCTTTCTCCCTTCGGGAAGCGTGGCGCTTTCTCATAGCTCAGCTGTAGGTATCTCAGTTTC
GGTGTAGGTTCGTTTCGCTCCAAGCTGGGCTGTGTGCACGAACCCCCCGTTTCAGCCCGACCGCTGCGCCTTATCCGG
TAACTATCGTCTTGAGTCCAACCCGGTAAGACACGACTTATCGCCACTGGCAGCAGCCACTGGTAACAGGATTAG
CAGAGCGAGGTATGTAGGCGGTGCTACAGAGTTCTTGAAGTGGTGGCCTAACTACGGCTACACTAGAAGGACAGT
ATTTGGTATCTGCGCTCTGCTGAAGCCAGTTACCTTCGGAAAAAGAGTTGGTAGCTCTTGATCCGGCAAAACAAAC
CACCGCTGGTAGCGGTGGTTTTTTTTGTTTTGCAAGCAGCAGATTACGCGCAGAAAAAAGGATCTCAAGAAAGATCC
TTTTTACCAATGCTTAATCAGTGAGGCACCTATCTCAGCGATCTGTCTATTTTCGTTTCATCCATAGTTGCTGACT
CCCCGTCGTGTAGATAACTACGATACGGGAGGGCTTACCATCTGGCCCCAGTGTGCAATGATACCGCGAGAGCC
ACGCTCACCGGCTCCAGATTTATCAGCAATAAACCAGCCAGCCGGAAGGGCCGAGCGCAGAAGTGGTCTGCAAC
TTTATCCGCTCCATCCAGTCTATTAATTGTTGCCGGGAAGCTAGAGTAAGTAGTTCGCCAGTTAATAGTTTGGC
CAACGTTGTTGCCATTGCTACAGGCATCGTGGTGTACGCTCGTCTGTTGGTATGGCTTCATTCAGCTCCGGTTC
CCAACGATCAAGGCGAGTTACATGATCCCCATGTTGTGCAAAAAAGCGGTTAGCTCCTTCGGTCTCCGATCGT
TGTCAGAAGTAAGTTGGCCGAGTGTATCACTCATGGTTATGGCAGCACTGCATAATTCTCTTACTGTTCATGCC
ATCCGTAAGATGCTTTTCTGTGACTGGTGTGACTCAACCAAGTCATTCTGAGAATAGTGTATGCGGCGACCGAG
TTGCTCTTGGCCGGCGTCAATACGGGATAATACCGCGCCACATAGCAGAACTTTAAAAGTGTCTCATCTTGGAAA
ACGTTCTTCGGGGCGAAAACCTCTCAAGGATCTTACCCTGTTGAGATCCAGTTCGATGTAACCCACTCGTGCACC
CAACTGATCTTCAGCATCTTTTACTTTTACCAGCGTTTCTGGGTGAGCAAAAACAGGAAGGCAAAATGCCGAAA
AAAGGGAATAAGGGCGACACGGAATGTTGAATACTCATACTCTTCTTTTTCAATATTTATGAAGCATTTATCA
GGGTTATTGTCTCAT

```

*E. coli* **murein lipoprotein promoter** is in red and **ELVd** cDNA (C327 to G46 of AJ536613) is in black with the repeated hammerhead ribozyme domain on yellow background. cDNA coding for the **precursor of a Cpf1-based crRNA** in blue inserted between T245 and T246 of ELVd cDNA. Ribozymes self-cleavage sites are underlined. *E. coli* ribosomal **rrnC terminator** is in fuchsia. **pUC replication origin** is in gray and **ampicillin resistance gene** (inverse orientation) on gray background (**promoter** on dark gray background).

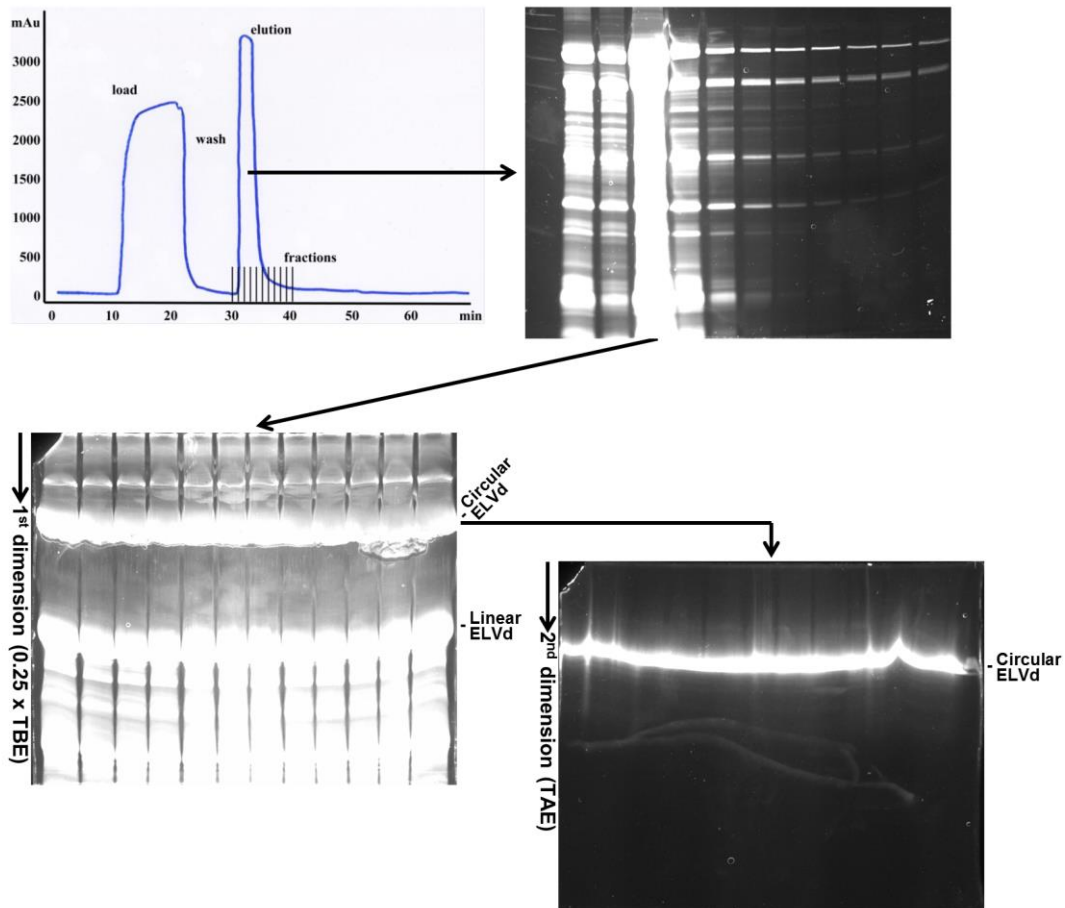

**Figure S21.** Workflow that illustrates the purification process of a circular RNA produced in *E. coli* using the ELVd-derived system. Total *E. coli* RNAs are first purified by anion exchange chromatography using a DEAE Sepharose column. Aliquots of the different fractions that elute in the presence of 1 M NaCl are analyzed by denaturing (8 M urea) PAGE. Selected fraction is subjected to a two-step electrophoretic separation in polyacrylamide gels. First, RNAs are separated by PAGE in 8 M urea gels in 0.25 x TBE buffer. After ethidium bromide staining of the gel, the band corresponding to the circular RNAs is excised and loaded on top of a second non-denaturing gel that is run in TAE buffer. Circular RNAs are detected in the second gel by ethidium bromide staining and eluted.
